# Supplementary material for: Novel phenomena for aggregation induced emission enhancement: highly fluorescent hydrophobic TPE-BODIPY couples in both organic and aqueous media
Source: Royal Society of Chemistry journal article supplement (doi:10.1039/c3ra40791h), 2013-01-01
Supplement: c3ra40791h.pdf [file c3ra40791h.pdf]

## SUPPORTING INFORMATION FOR

### **Novel phenomena for aggregation induced emission enhancement: highly fluorescent hydrophobic TPE-BODIPY couples in both organic and aqueous media**

**Melek Baglan,<sup>[a]</sup> Sevilay Ozturk,<sup>[a]</sup> Bahri Gür,<sup>[b]</sup> Kadem Meral,<sup>[b]</sup> Uğur Bozkaya,<sup>[b]</sup>  
O. Altan Bozdemir,<sup>\*[b]</sup> Serdar Atılgan<sup>\*[a]</sup>**

*<sup>a</sup>Department of Chemistry, Suleyman Demirel University, Isparta, 32000, Turkey*

*<sup>b</sup>Department of Chemistry, Ataturk University, Erzurum, Turkey*

#### **TABLE OF CONTENTS**

##### **S1. Experimental**

S1.1 General

S1.2 Synthesis

S1.3 Preparation of Langmuir-Blodgett and spin-coating films

S1.4 Computational studies

S1.5 References

##### **S2. Additional Data**

S2.1 Spectrophotometric data

S2.2 DLS analysis

S2.3 <sup>1</sup>H and <sup>13</sup>C NMR spectra and HRMS spectra

S2.4 Cartesian coordinates

S2.5 Calculated electronic excitation energies with the first 20 excited states of fluorophores and oscillator strengths in THF and water.

## S1. EXPERIMENTAL

### S1.1 GENERAL

All chemicals and solvents purchased from Aldrich were used without further purification.  $^1\text{H}$  NMR and  $^{13}\text{C}$  NMR spectra were recorded using a Bruker DPX-400 in  $\text{CDCl}_3$  with TMS as internal reference. The THF was further refluxed over metallic sodium in the presence of benzophenone until a persistent blue color was obtained and then it was distilled under an argon atmosphere. Absorption spectrometry was performed using a Shimadzu spectrophotometer. Steady state fluorescence measurements were conducted using a Shimadzu RF-5301PC spectrofluorometer. Fluorescence decays for the lifetime measurements were carried out by means of a LaserStrobe Model TM-3 lifetime fluorophotometer from Photon Technology International (PTI). Column chromatography of all products was performed using Merck Silica Gel 60 (particle size: 0.040–0.063 mm, 230–400 mesh ASTM). Reactions were monitored by thin layer chromatography using fluorescent coated aluminum sheets. Solvents were purchased from Sigma and solvents used for spectroscopy experiments were spectrophotometric grade. TPE-COOH,<sup>1</sup> and TPE-B(OH)<sub>2</sub><sup>2</sup> was synthesized according to the literature procedure. SEM images of (TPE)<sub>3</sub>BOD was obtained after evaporation of the solvent mixture with conductive carbon adhesive and monitored by Quanta 200 FEG scanning electron microscope. DLS measurements were performed with a Malvern Nano Zetasizer. Confocal Fluorescence Microscope analyses were performed. Fluorescence microscopy images of the dyes were performed at the METU Central Laboratory.

### S1.2 SYNTHESIS

#### Synthesis of TPECOH 2

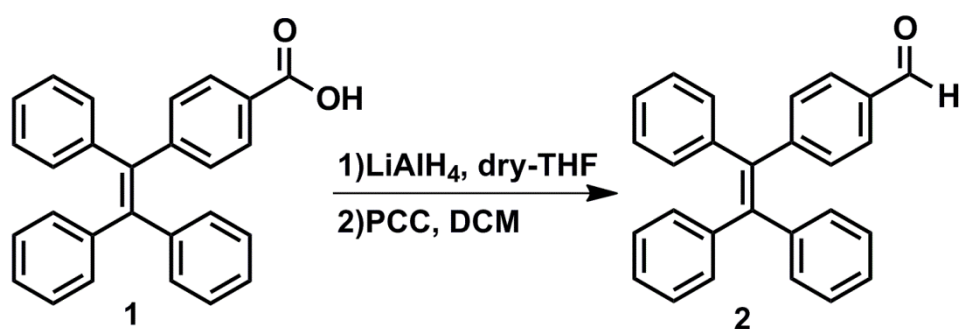

TPE-COOH 1 (490 mg, 1.302 mmol) prepared according to the literature procedure<sup>1</sup> was firstly reduced to TPE-CH<sub>2</sub>OH with excess amount of  $\text{LiAlH}_4$  (494.1 mg, 13.02 mmol) in 20 mL dry-THF. The crude product filtered and washed with methanol and white solute was collected followed by the evaporation of the solvent mixture under reduced pressure. The crude product was, then, used to yield TPE-COH with excess amount of pyridinium chloro

chromate (PCC) (2.81 g, 13.02 mmol) in  $\text{CH}_2\text{Cl}_2$  (20 ml) without any further purification. After 2 hours, Crude reaction was extracted with basic aqueous solution one times, then three times with acidic aqueous solution. The organic phase was collected and solvent removed by evaporation. **2** was collected after column chromatography with an eluent  $\text{CH}_2\text{Cl}_2$  (294 mg, 62.5%)

**$^1\text{H}$  NMR (400 MHz,  $\text{CDCl}_3$ )  $\delta$** ; 9.90 (s, 1H), 7.62-7.60 (d, 2H  $J=8.2$  Hz), 7.22-7.20 (d, 2H  $J=8.2$  Hz), 7.11-7.09 (m, 9H), 7.05-7.00 (m, 6H)

**$^{13}\text{C}$  NMR (100 MHz,  $\text{CDCl}_3$ )  $\delta$** ; 191.8, 150.8, 143.4, 143.3, 143.2, 140.1, 134.6, 132.3, 131.7, 131.6, 131.5, 130.3, 129.8, 129.5, 129.3, 129.0, 128.8, 128.7, 128.3, 127.4, 127.2, 127.1 (overlapping has been observed for some aromatic carbon atoms)

**MALDI (TOF)  $m/z$** : 361.16102 ( $2+\text{H}^+$  calculated 361.15924,  $\Delta=1.78$  ppm)

### Synthesis of TPE-BOD **3**

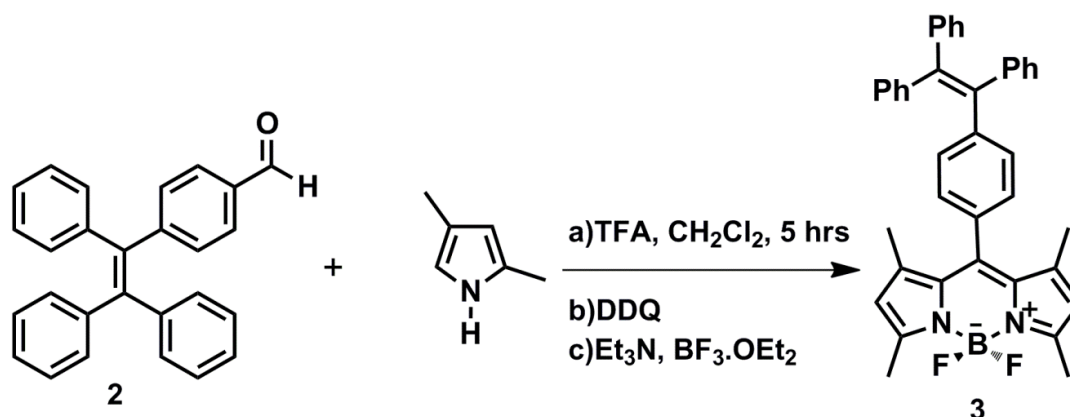

TPE-Al **2** (200 mg 0.55 mmol,) and 2,4-dimethyl pyrrole **3** (137.12 mg 1.11 mmol,) were dissolved in  $\text{CH}_2\text{Cl}_2$  (250 ml) and purged with argon in a 500 ml flask. 1 drop of TFA was added as a catalyst and the mixture was stirred at room temperature for 3 hrs. When TLC showed consumption of the aldehyde was complete, a solution of 166 mg (0.68 mmol) of DDQ (Tetrachloro-1,4-benzoquinone) in 10 mL  $\text{CH}_2\text{Cl}_2$  was added. After 2 h,  $\text{Et}_3\text{N}$  (3 ml) and  $\text{BF}_3\cdot\text{OEt}_2$  (3 ml) were added. Immediately, after the addition of  $\text{BF}_3\cdot\text{OEt}_2$  bright green fluorescence was observed. Crude product washed three times with water, dried over  $\text{Na}_2\text{SO}_4$  and concentrated in vacuum. Then crude product purified by silica gel column chromatography using  $\text{CHCl}_3/\text{CH}_3\text{OH}$  (99/1, v/v). The orange fraction which has green fluorescence was collected. Orange solid (86 mg, 28%)

**$^1\text{H}$  NMR (400 MHz,  $\text{CDCl}_3$ )  $\delta$** ; 7.19-7.02 (m, 19H), 5.97 (s, 2H), 2.54 (s, 6H), 1.41 (s, 6H)

**$^{13}\text{C}$  NMR (100 MHz,  $\text{CDCl}_3$ )  $\delta$** ; 132.42, 132.15, 131.64, 131.44, 131.40, 129.37, 128.12, 128.02, 127.99, 127.96, 127.61, 126.91, 125.74, 121.36, 30.53, 14.88.

**MALDI (TOF)  $m/z$** : 578.28284 (calculated 578.27049,  $\Delta=12.35$  ppm)

### Synthesis of Iodinated TPE-BOD, 4

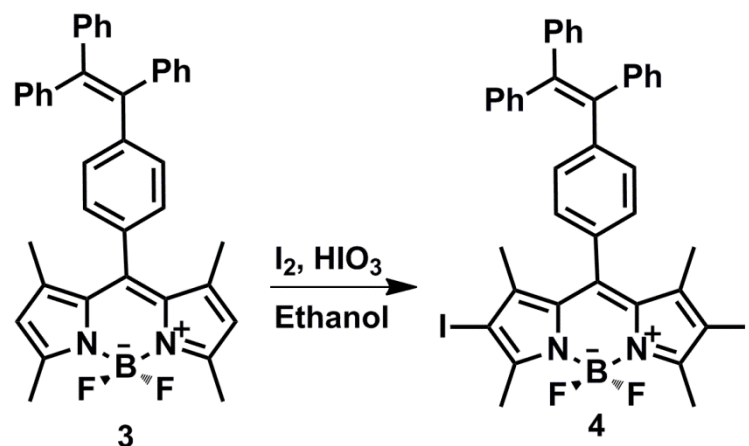

TPE-BOD **3** (340 mg, 0.58 mmol) was dissolved in ethanol (100ml) and iodine (38 mg, 0.15 mmol) was added to the reaction mixture. Iodic acid (209.2 mg, 1.16 mmol) was dissolved in minimum amount of water and was added to the reaction mixture in a dropwise manner. The reaction temperature was adjusted to 60<sup>0</sup>C. The reaction was monitored by TLC and when complete consumption of **3** was seen the reaction was completed. Crude reaction was dissolved in chloroform and extracted with water three times. Then crude product purified by silica gel column chromatography using hexane/CHCl<sub>3</sub> (90/10, v/v) to yield 424.56 mg **4** (87%).

<sup>1</sup>H NMR (400 MHz, CDCl<sub>3</sub>) δ; 7.22-6.98 (m, 19H), 2.62 (s, 6H), 1.42 (s, 6H)

<sup>13</sup>C NMR (100 MHz, CDCl<sub>3</sub>) δ; 156.83, 145.93, 145.42, 143.59, 143.30, 143.28, 142.40, 141.68, 140.05, 132.73, 131.64, 131.43, 131.38, 128.12, 128.07, 128.00, 127.44, 127.13, 127.02, 32.16, 16.24. (overlapping has been observed for some aromatic carbon atoms)

### Synthesis of (TPE)<sub>3</sub>BOD 6

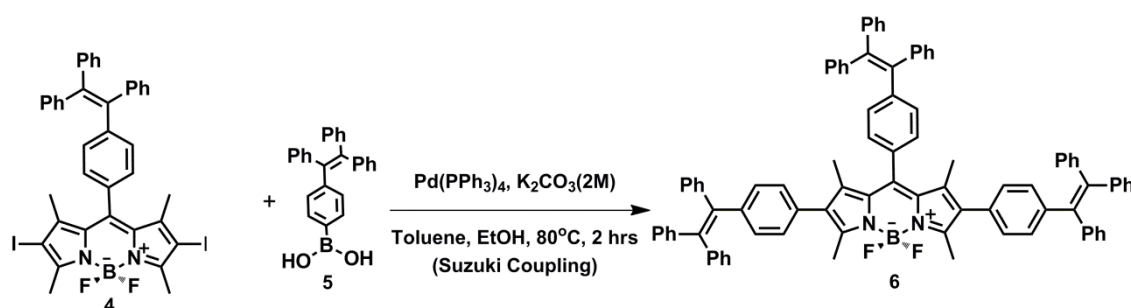

Iodinated-(TPE)BOD **4** (93 mg, 0.11 mmol) and TPE-B(OH)<sub>2</sub> **5** (105 mg, 0.28 mmol) was mixed in toluene (50 ml), 2M aqueous K<sub>2</sub>CO<sub>3</sub> solution (8 ml) and EtOH (8 ml). The

mixture was stirred for 40 min under argon atmosphere at room temperature. Then, catalytic amount of Pd(PPh<sub>3</sub>)<sub>4</sub> (12 mg 0.011 mmol) was added and the reaction mixture was stirred at 80°C for 2 h. After cooling to room temperature, the product was concentrated under reduced vacuum and purified by silica gel column chromatography with eluent CHCl<sub>3</sub>/hexane (85/15, v/v), (109.0 mg, 80%)

**<sup>1</sup>H NMR (400 MHz, CDCl<sub>3</sub>) δ:** 7.19-6.99 (m, 53H), 6.88 (d, 4H), 2.47 (s, 6H), 1.30(s, 6H).

**<sup>13</sup>C NMR (100 MHz, CDCl<sub>3</sub>) δ:**154.28, 145.30, 143.96, 143.78, 143.66, 143.47, 143.42, 142.68, 142.03, 141.54, 140.93, 140.32, 139.12, 133.66, 133.56, 132.49, 131.91, 131.68, 131.61, 131.58, 131.54, 131.46, 131.40, 129.58, 128.02, 127.98, 127.93, 127.88, 127.74, 126.92, 126.74, 126.69, 126.65, 126.10, 13.56, 13.25. (Overlapping has been observed for some aromatic carbon atoms)

**MALDI (TOF) m/z:** 1238.55606 (calculated 1238.55219, Δ=3.87 ppm)

### Synthesis of Iodinated-8H-BODIPY 8

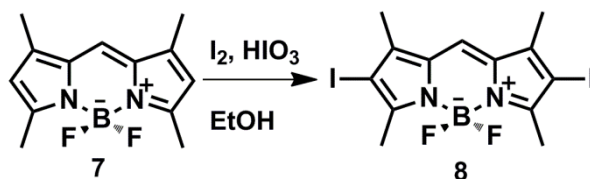

Compound **7** (0.100 g, 0.40 mmol) was dissolved in ethanol (100 ml) and iodine (0.26 g, 1.0 mmol) was added to the reaction mixture. Iodic acid (0.14 g, 0.8 mmol) was dissolved in a minimum amount of water and was added to the reaction mixture in a dropwise manner. The reaction temperature was 60<sup>0</sup>C. The reaction was monitored by TLC and when complete consumption of **1** was seen the reaction was completed. Crude reaction mixture was dissolved in chloroform and extracted with water three times. Silica-gel column chromatography (hexane/CH<sub>2</sub>Cl<sub>2</sub> 4/1) gave **8** as a red solid (150 mg, 75% yield)

**<sup>1</sup>H NMR (400 MHz, CDCl<sub>3</sub>) δ:** 7.10 (s, 1H), 2.6 (s, 6H), 2.25 (s, 6H)

**<sup>13</sup>C NMR (100 MHz, CDCl<sub>3</sub>) δ:** 157.72, 144.35, 132.84, 120.21, 82.03, 15.67, 13.74

### Synthesis of (TPE)<sub>2</sub>BOD **9**

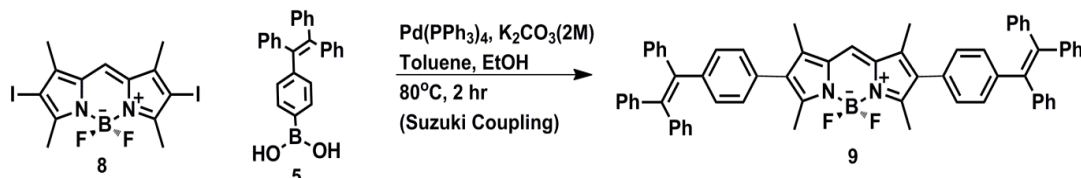

Iodinated-BODIPY, **8**, (90 mg, 0.18 mmol) and the TPE-B(OH)<sub>2</sub>, **5**, (169 mg, 0.45 mmol) were added to a mixture of toluene (50 mL), 2M aqueous Na<sub>2</sub>CO<sub>3</sub> solution (8 mL) and EtOH (8 mL). The mixture was stirred for 40 min under an argon atmosphere at room temperature. Then the Pd(PPh<sub>3</sub>)<sub>4</sub> catalyst (catalytic amount) was added and the reaction mixture was stirred at 80°C for 16 h. The reaction mixture was concentrated under vacuum, and the crude product was purified by silica-gel column chromatography with hexane/CH<sub>2</sub>Cl<sub>2</sub> (2/1, v/v) as eluent affording a red solid (137.4 mg, yield 84.0%).

<sup>1</sup>H NMR (400 MHz, CDCl<sub>3</sub>) δ; 7.16-6.98 (m, 39H), 2.50 (s, 6H), 2.00 (s, 6H)

<sup>13</sup>C NMR (100 MHz, CDCl<sub>3</sub>) δ; 155.39, 143.71, 143.62, 143.51, 142.51, 141.36, 140.67, 137.09, 133.02, 131.89, 131.75, 131.52, 131.38, 131.34, 128.87, 128.68, 127.73, 127.67, 127.62, 126.52, 126.40, 126.20, 120.06

MALDI (TOF) m/z: 908.40935 (calculated, 908.41134, Δ=1.99 ppm)

### Synthesis of (Ph)<sub>2</sub>BOD, **6**.

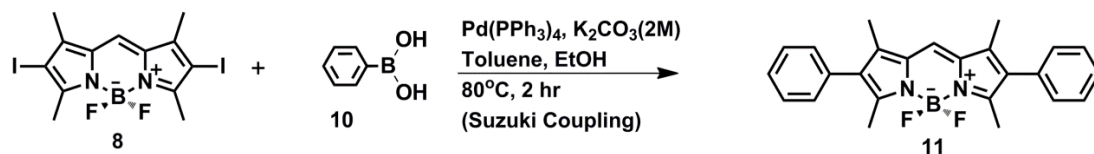

Experimental procedure, used for the synthesis of compound **9** was repeated for the synthesis of (Ph)<sub>2</sub>BOD **11**. PhB(OH)<sub>2</sub>, **10**, was used as a reagent and the product was purified by column chromatography with CHCl<sub>3</sub>/Hexane (60/40, v/v).

<sup>1</sup>H NMR (400 MHz, CDCl<sub>3</sub>) δ; 7.44 (t, 4H), 7.33 (dd, 2H), 7.33 (dd, 4H), 7.19 (s, 1H), 2.55 (s, 6H), 2.24 (s, 6H).

<sup>13</sup>C NMR (100 MHz, CDCl<sub>3</sub>) δ; 133.78, 129.92, 128.65, 127.31, 120.52, 13.68, 10.46 (overlapping has been observed for some aromatic carbon atoms)

MALDI (TOF) m/z: 400.19180 (calculated, 400.19224, Δ=0.44 ppm)

### S1.3 Langmuir-Blodgett and spin-coating films of **9**

Langmuir-Blodgett (LB) films of **9** were fabricated by a commercially available LB deposition trough (KSV, Minithrough). The pure water used for the subphase was obtained from a KrosClinic (Model: KRS-R-75) and its resistivity was 18.2 MΩcm. The pH of the subphase was 6.3 and the temperature was 22°C. Glass substrates were cleaned by keeping them for 30 min in a piranha solution (3:7 v/v 30% H<sub>2</sub>O<sub>2</sub> and H<sub>2</sub>SO<sub>4</sub>) then substrates were repeatedly washed with deionized water and dried in a hot air oven.

In the Langmuir-Blodgett (LB) film fabrication, surface pressure at the air-water interface was measured by a Wilhelm plate. Floating layer of **9** mixed with SA at the air-water interface was prepared by the moving barrier maintaining constant surface pressure with a precision of ±0.1 mN/m. For LB film deposition, the spreading solution was composed of a mixture of (TPE)<sub>2</sub>BOD with SA (0.5 mg/ml) in chloroform. 25 μL of this solution was slowly spread on the air-water interface of a standard LB trough by using Hamilton micro-syringe. After allowing 20 min. to evaporate the chloroform solvent, the monolayer at the air-water interface was slowly and simultaneously compressed by using two compression barriers. The barrier speed was 5 cm<sup>2</sup>/min. Y-type deposition of monolayer was achieved by slowly withdrawing the glass slide vertically through the floating monolayer at a speed of 3 mm/min at a constant surface pressure of 25 mN/m. The transfer ratios for the monolayer of **9** mixed with SA were found to be about 1.0±0.1. This value is suitable to fabricate good quality LB films of **9** molecules mixed with SA. To produce spin-coating thin films of **9**, several solutions in THF were prepared and coated onto a cleaned glass slides at 2500 rpm for 30 second by spin-coater

### S1.4 Computational Methods

For **9** theoretical computations were carried out using Gaussian 03 program package.<sup>3</sup> Austin model 1 (AM1)<sup>4-6</sup> and density functional theory (DFT) were utilized for this purpose. The optimized geometry and harmonic vibrational frequencies were computed with the AM1 method. At the optimized AM1 geometry a single point energy calculation was performed with the B3LYP functional.<sup>8,9</sup> In the DFT computation Pople's polarized triple-ζ split valence basis set, 6-311G (d,p), was employed.<sup>10-11</sup>

### S1.5 References

1. Ichiro, S., Toshio, S., Hiroaki, N. EPO patent, JP9255949 (A) 1997.
2. Z. Wang, Y. Liu, H. S. Kowk, Y. Ma, B. Z. Tang, *Adv. Mater.*, 2010, 22, 2159–2163
3. L. Haiyin, C. Zhenguang, X. Bingjia, Z. Xiqi, L. Xiaofang, L. Siwei, Z. Yi, X. Jiarui, *J. Mater. Chem.*, 2011, 21, 3760.
4. Gaussian 03, Revision D.01, M. J. Frisch and G. W. Trucks and H. B. Schlegel and G. E. Scuseria and M. A. Robb and J. R. Cheeseman and Montgomery and Jr. and J. A. and T. Vreven and K. N. Kudin and J. C. Burant and J. M. Millam and S. S. Iyengar

and J. Tomasi and V. Barone and B. Mennucci and M. Cossi and G. Scalmani and N. Rega and G. A. Petersson and H. Nakatsuji and M. Hada and M. Ehara and K. Toyota and R. Fukuda and J. Hasegawa and M. Ishida and T. Nakajima and Y. Honda and O. Kitao and H. Nakai and M. Klene and X. Li and J. E. Knox and H. P. Hratchian and J. B. Cross and V. Bakken and C. Adamo and J. Jaramillo and R. Gomperts and R. E. Stratmann and O. Yazyev and A. J. Austin and R. Cammi and C. Pomelli and J. W. Ochterski and P. Y. Ayala and K. Morokuma and G. A. Voth and P. Salvador and J. J. Dannenberg and V. G. Zakrzewski and S. Dapprich and A. D. Daniels and M. C. Strain and O. Farkas and D. K. Malick and A. D. Rabuck and K. Raghavachari and J. B. Foresman and J. V. Ortiz and Q. Cui and A. G. Baboul and S. Clifford and J. Cioslowski and B. B. Stefanov and G. Liu and A. Liashenko and P. Piskorz and I. Komaromi and R. L. Martin and D. J. Fox and T. Keith and M. A. Al-Laham and C. Y. Peng and A. Nanayakkara and M. Challacombe and P. M. W. Gill and B. Johnson and W. Chen and M. W. Wong and C. Gonzalez and J. A. Pople, Gaussian, Inc., Wallingford, CT, 2004.

5. M. J. S. Dewar, E. G. Zoebisch, and E. F. Healy, *J. Am. Chem. Soc.*, **1985**, 107, 3902.
6. M. J. S. Dewar, C. Jie, and E. G. Zoebisch, *Organometallics.*, 1988, 7, 513.
7. M. J. S. Dewar and E. G. Zoebisch, *J. Mol. Struct. Theochem*, 1988, 180, 1.
8. A. D. Becke, *J. Chem. Phys.*, 1993, 98, 5648.
9. C. Lee, W. Yang, and R. G. Parr, *Phys. Rev. B*, **1988**, 37, 785.
10. P. C. Hariharan and J. A. Pople, *Theor. Chem. Acc.*, **1973**, 28, 213.
11. A. D. McLean and G. S. Chandler, *J. Chem. Phys.*, **1980**, 72, 5639



## S2 . ADDITIONAL DATA

### S2.1 Spectrophotometric studies

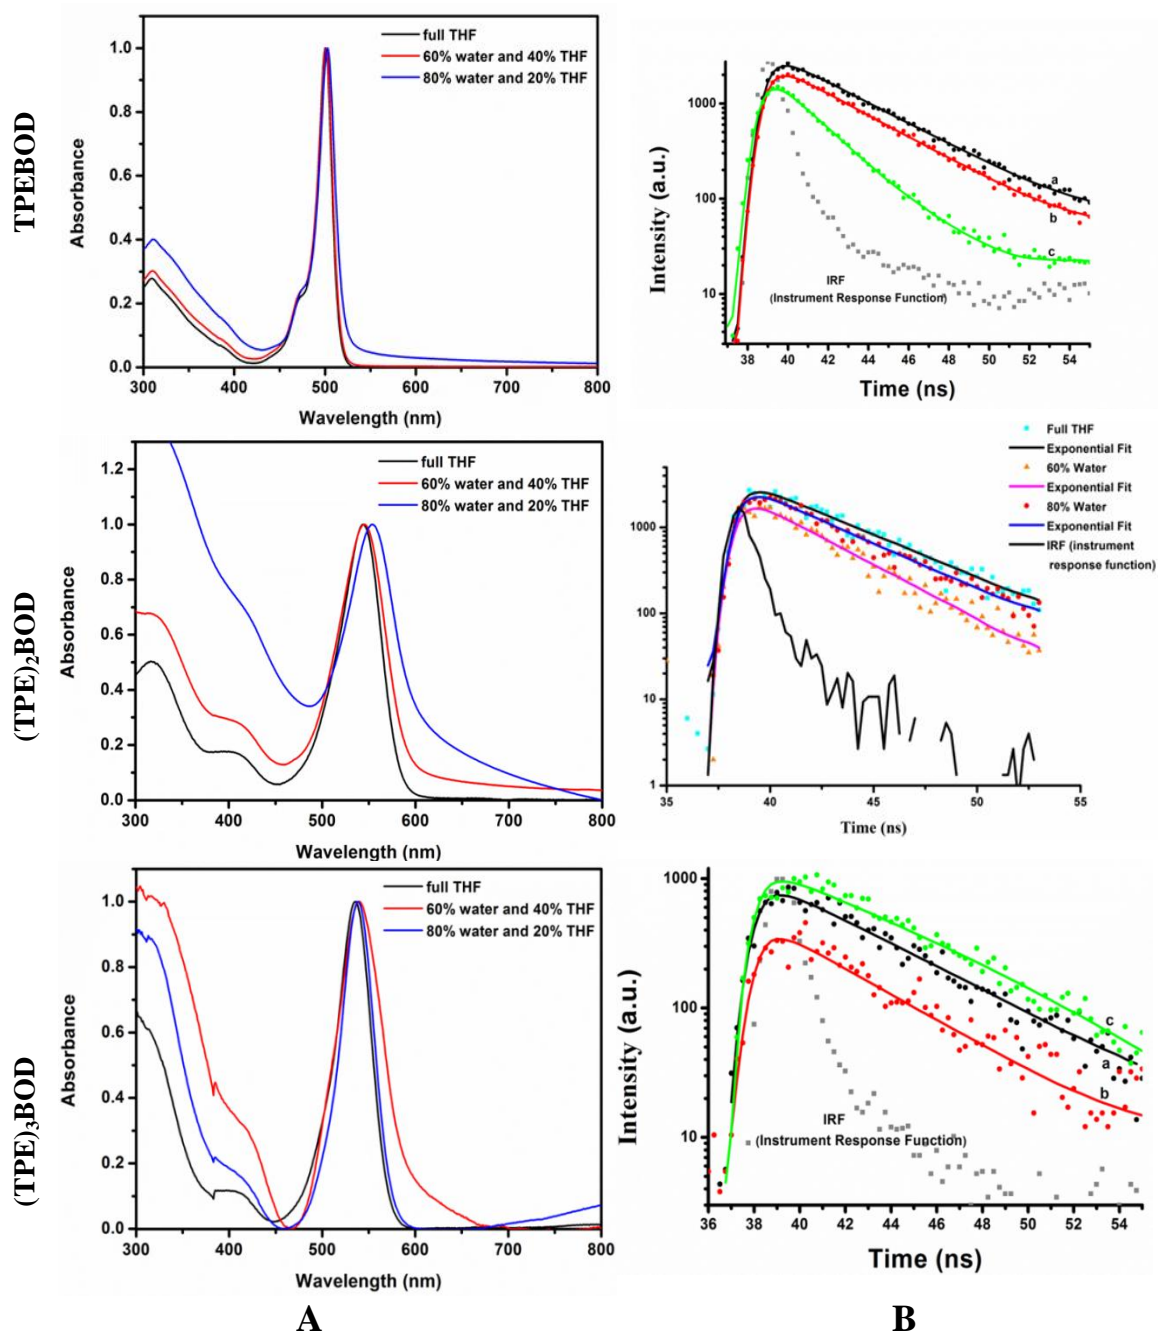

**Fig.S1** a) Normalized absorption spectra of fluorophores TPEBOD, (TPE)<sub>2</sub>BOD, (TPE)<sub>3</sub>BOD in THF, 6:4 H<sub>2</sub>O/THF and 8:2 H<sub>2</sub>O/THF b) Fluorescence Decay Profile of fluorophores

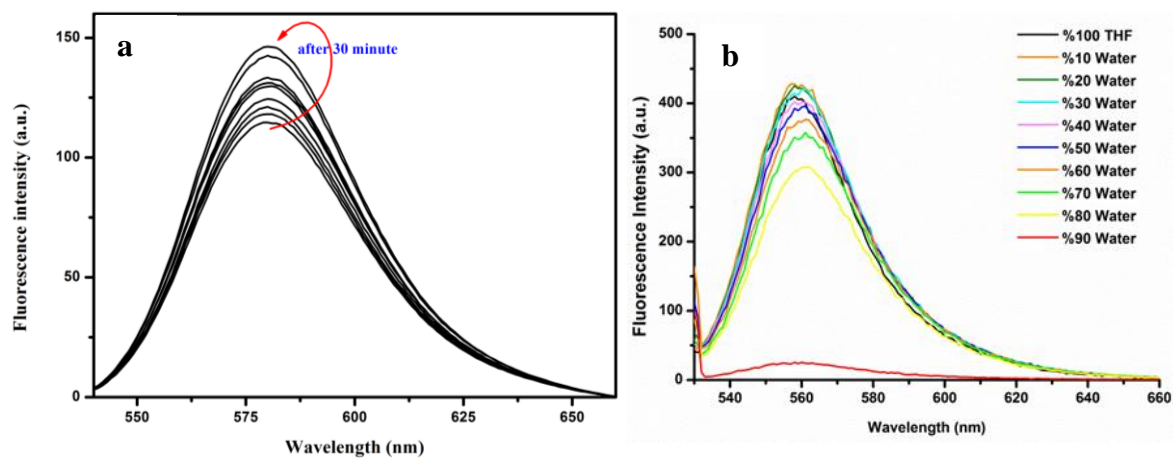

**Fig.S2** a) Emission maxima change of **9** with time in 70% water-THF solvent fraction. b) Fluorescence spectrum change of **11** in different water/THF mixture where excitation wavelength is 530 nm

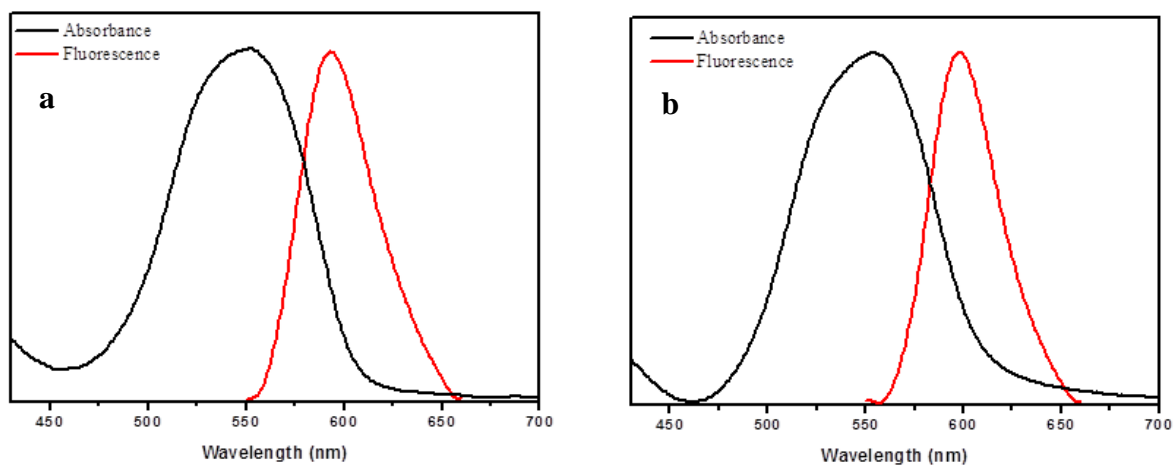

**Fig.S3:** a) Normalized absorption and emission spectra of  $1.0 \times 10^{-3}$  M (TPE)<sub>2</sub>BOD-LB film. b) Normalized absorption and emission spectra of  $1.0 \times 10^{-3}$  M **9** spin-coating film.

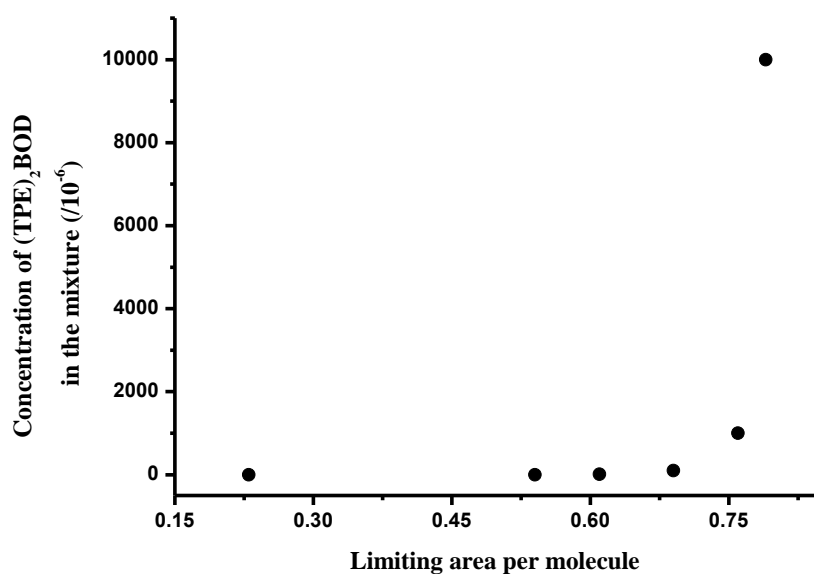

**Fig.S5:** Plot of the (TPE)<sub>2</sub>BOD concentration in the mixture versus limiting area of SA.

## S2.2 DLS analysis

|                                | Diam. (nm)           | % Intensity | Width (nm) |
|--------------------------------|----------------------|-------------|------------|
| <b>Z-Average (d.nm):</b> 754,3 | <b>Peak 1:</b> 873,1 | 100,0       | 231,5      |
| <b>Pdl:</b> 0,167              | <b>Peak 2:</b> 0,000 | 0,0         | 0,000      |
| <b>Intercept:</b> 0,918        | <b>Peak 3:</b> 0,000 | 0,0         | 0,000      |

**Result quality** Refer to quality report

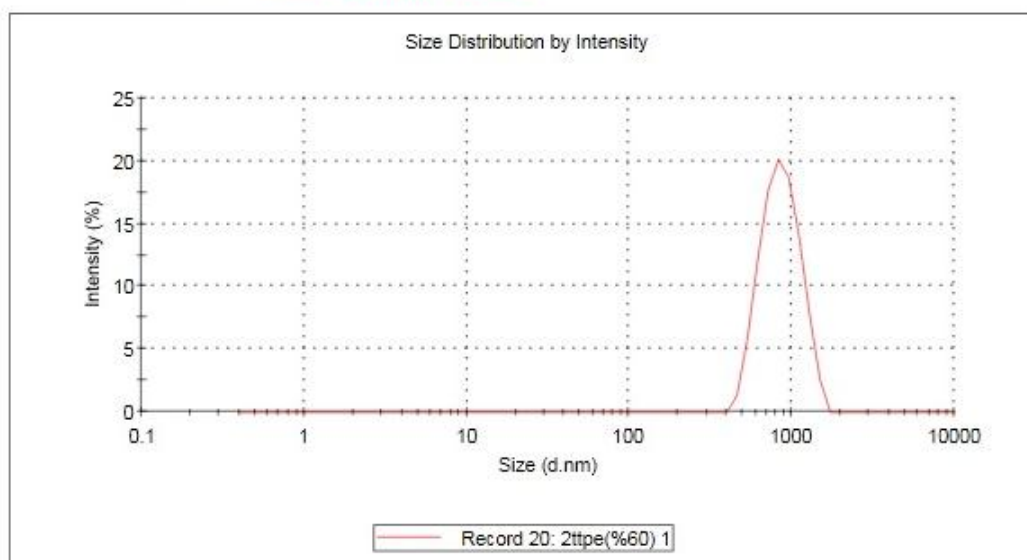

**Fig.S6:** Results of DLS analysis of **9** in 60% water-THF

|                                | Diam. (nm)           | % Intensity | Width (nm) |
|--------------------------------|----------------------|-------------|------------|
| <b>Z-Average (d.nm):</b> 285,9 | <b>Peak 1:</b> 388,1 | 100,0       | 214,1      |
| <b>Pdl:</b> 0,252              | <b>Peak 2:</b> 0,000 | 0,0         | 0,000      |
| <b>Intercept:</b> 0,955        | <b>Peak 3:</b> 0,000 | 0,0         | 0,000      |

**Result quality** Good

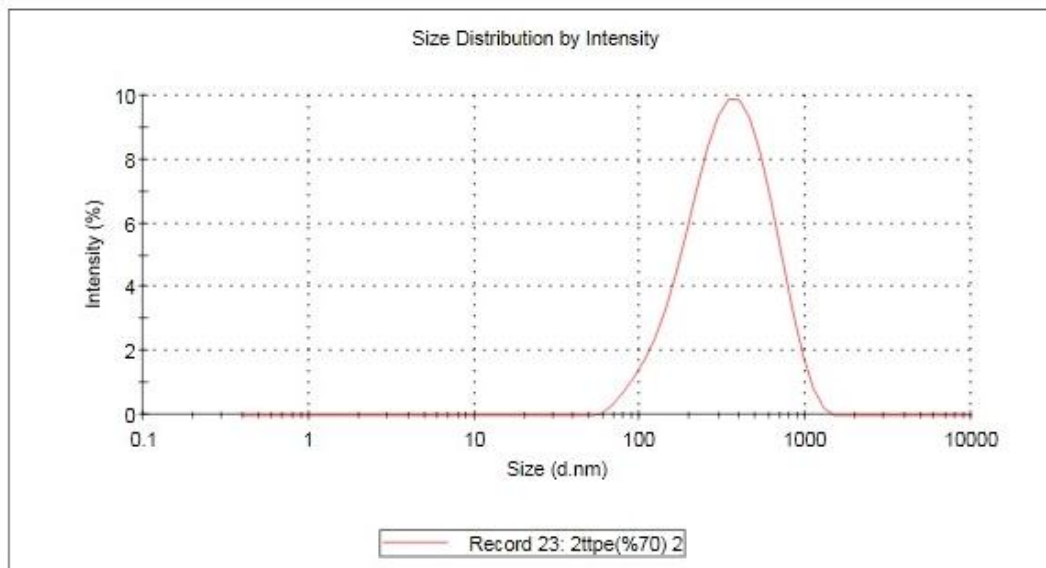

**Fig.S7:** Results of DLS analysis of **9** in 70% water-THF

|                                | Diam. (nm)           | % Number | Width (nm) |
|--------------------------------|----------------------|----------|------------|
| <b>Z-Average (d.nm):</b> 370,0 | <b>Peak 1:</b> 267,9 | 100,0    | 135,4      |
| <b>Pdl:</b> 0,219              | <b>Peak 2:</b> 0,000 | 0,0      | 0,000      |
| <b>Intercept:</b> 0,941        | <b>Peak 3:</b> 0,000 | 0,0      | 0,000      |

**Result quality** Good

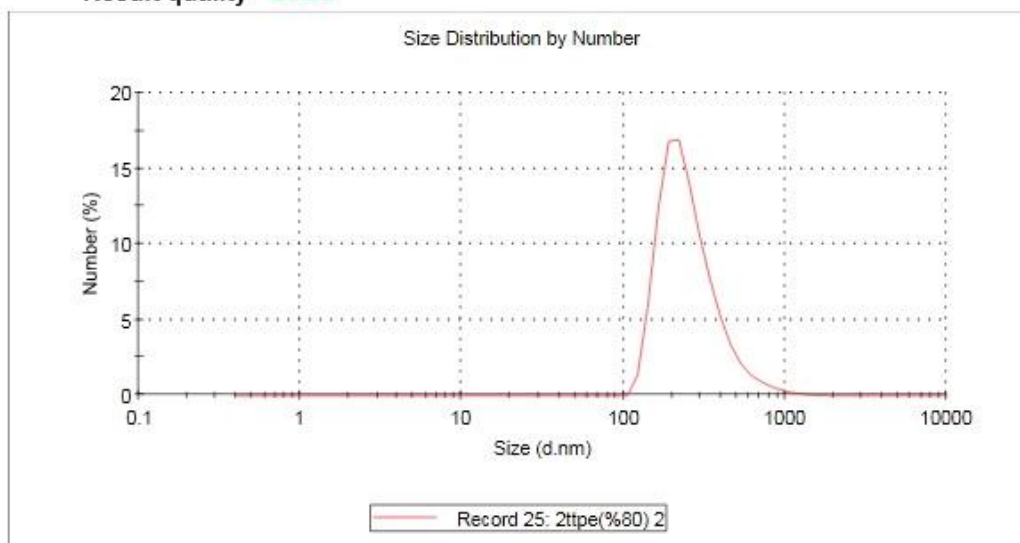

**Fig.S8:** Results of DLS analysis of **9** in 80% water-THF

|                                | Diam. (nm)           | % Intensity | Width (nm) |
|--------------------------------|----------------------|-------------|------------|
| <b>Z-Average (d.nm):</b> 765,9 | <b>Peak 1:</b> 860,9 | 100,0       | 236,5      |
| <b>Pdl:</b> 0,115              | <b>Peak 2:</b> 0,000 | 0,0         | 0,000      |
| <b>Intercept:</b> 0,963        | <b>Peak 3:</b> 0,000 | 0,0         | 0,000      |

**Result quality** Good

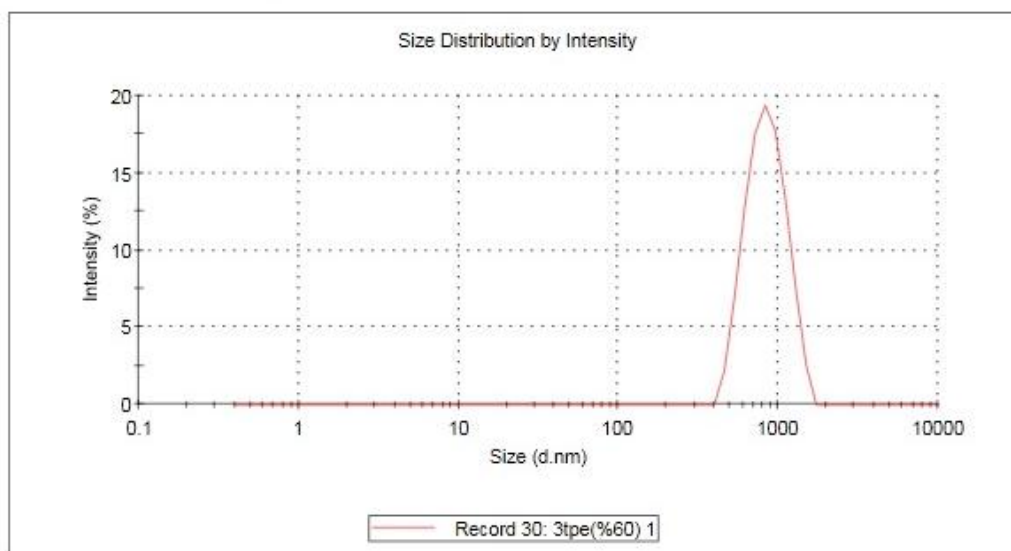

**Fig.S9:** Results of DLS analysis of **6** in 60% water-THF

|                                | Diam. (nm)           | % Intensity | Width (nm) |
|--------------------------------|----------------------|-------------|------------|
| <b>Z-Average (d.nm):</b> 327,9 | <b>Peak 1:</b> 354,5 | 94,7        | 151,8      |
| <b>Pdl:</b> 0,238              | <b>Peak 2:</b> 4511  | 5,3         | 873,6      |
| <b>Intercept:</b> 0,943        | <b>Peak 3:</b> 0,000 | 0,0         | 0,000      |

**Result quality** Good

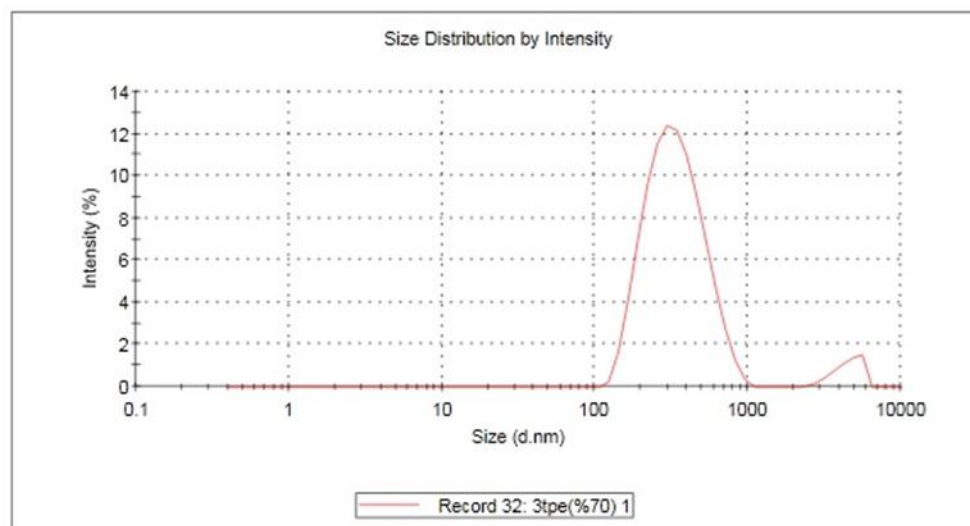

**Fig.S10:** Results of DLS analysis of **6** in 70% water-THF

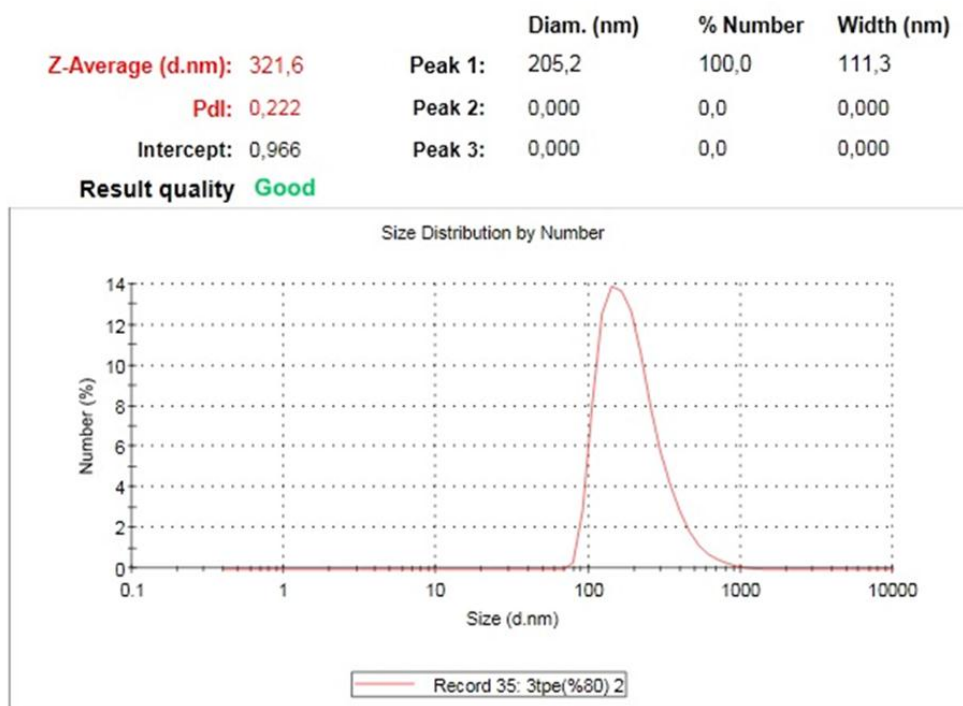

**Fig.S11:** Results of DLS analysis of **6** in 80% water-THF

## S2.2 $^1\text{H}$ and $^{13}\text{C}$ NMR spectra and HRMS spectrum

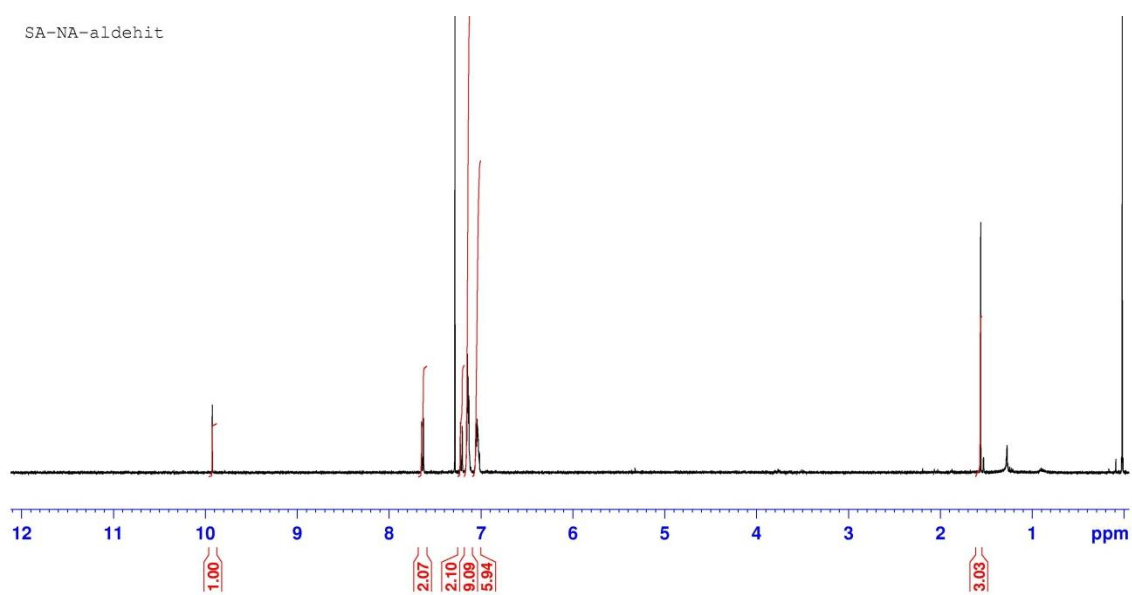

Fig.S12  $^1\text{H}$  NMR spectra of the TPE-Al 2

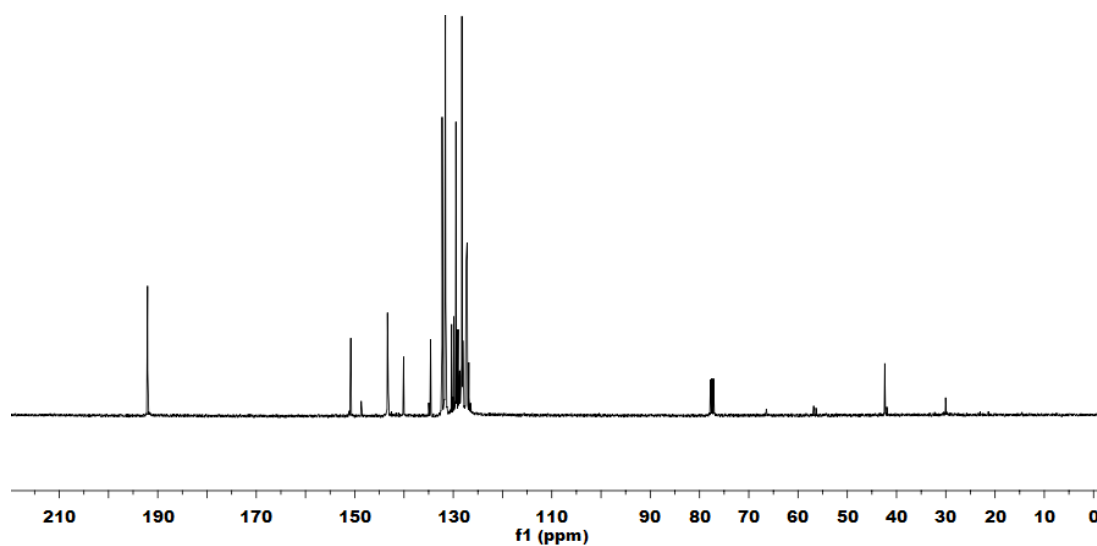

Fig.S13  $^{13}\text{C}$  NMR spectra of the compound 2

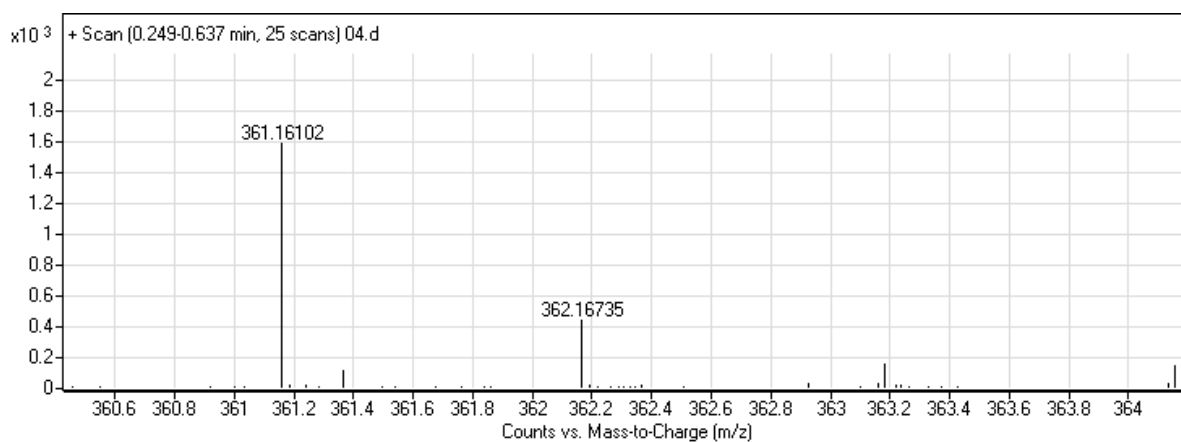

**Fig.S14** MALDI-TOF Analysis of the compound **2**

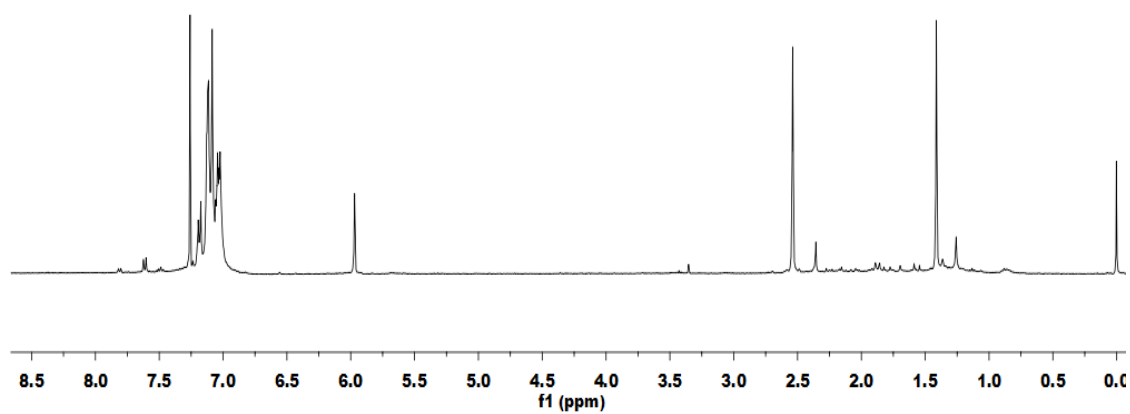

**Fig.S15** <sup>1</sup>H NMR spectra of the TPEBOD **3**

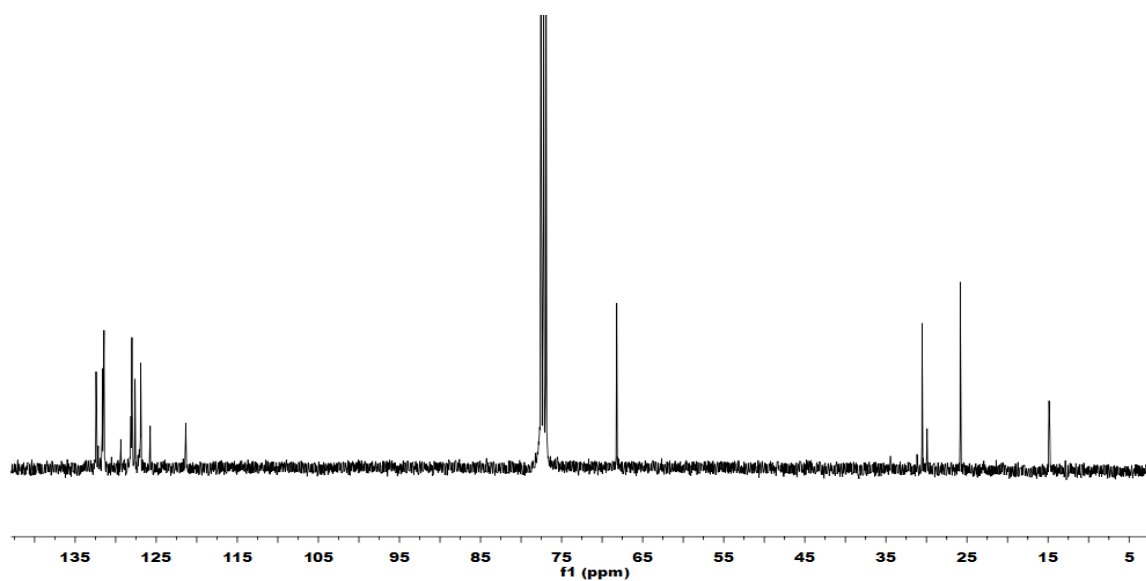

**Fig.S16** <sup>13</sup>C NMR spectra of the compound **3**



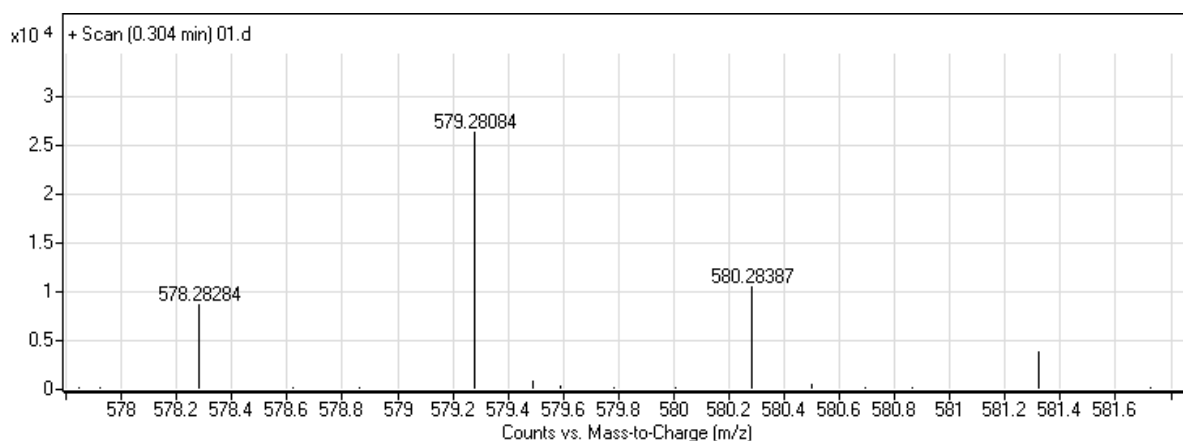

**Fig.S17** MALDI-TOF Analysis of the compound **3**

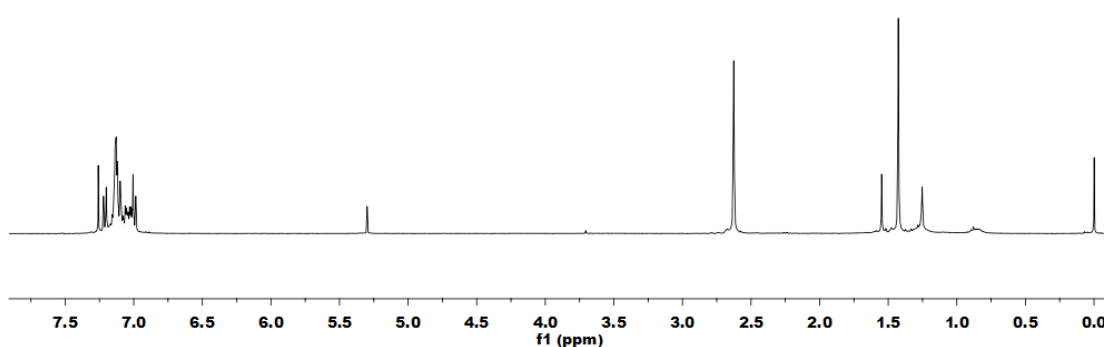

**Fig.S18** <sup>1</sup>H NMR spectra of iodinated TPEBOD **4**

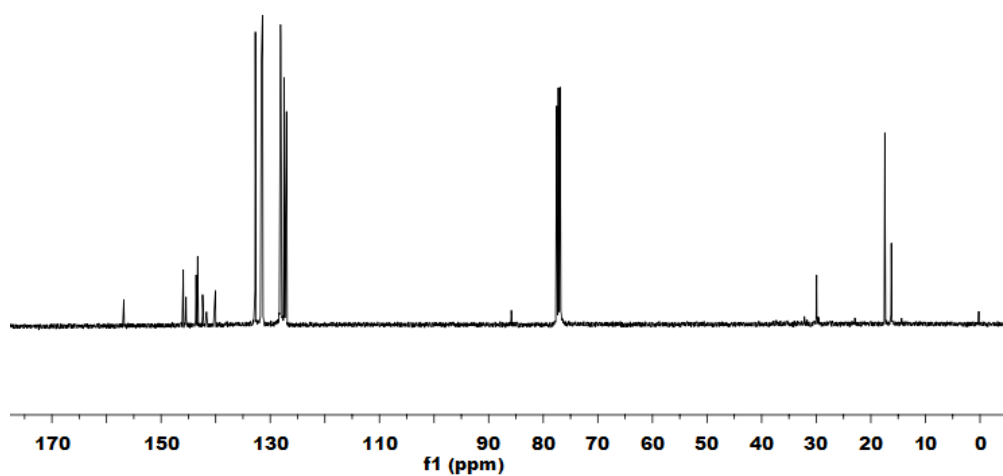

**Fig.S19** <sup>13</sup>C NMR spectra of the compound **4**

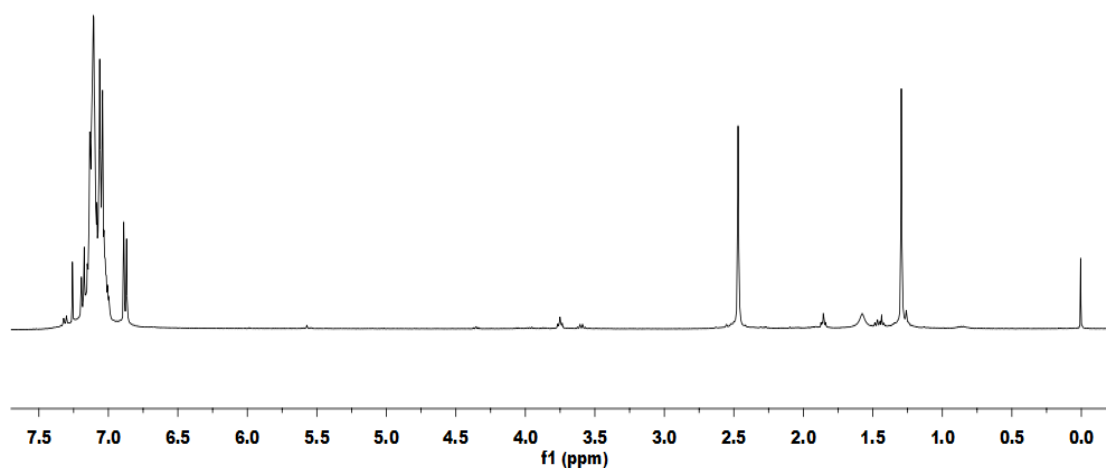

**Fig.S20** <sup>1</sup>H NMR spectra of iodinated (TPE)<sub>3</sub>BOD **6**

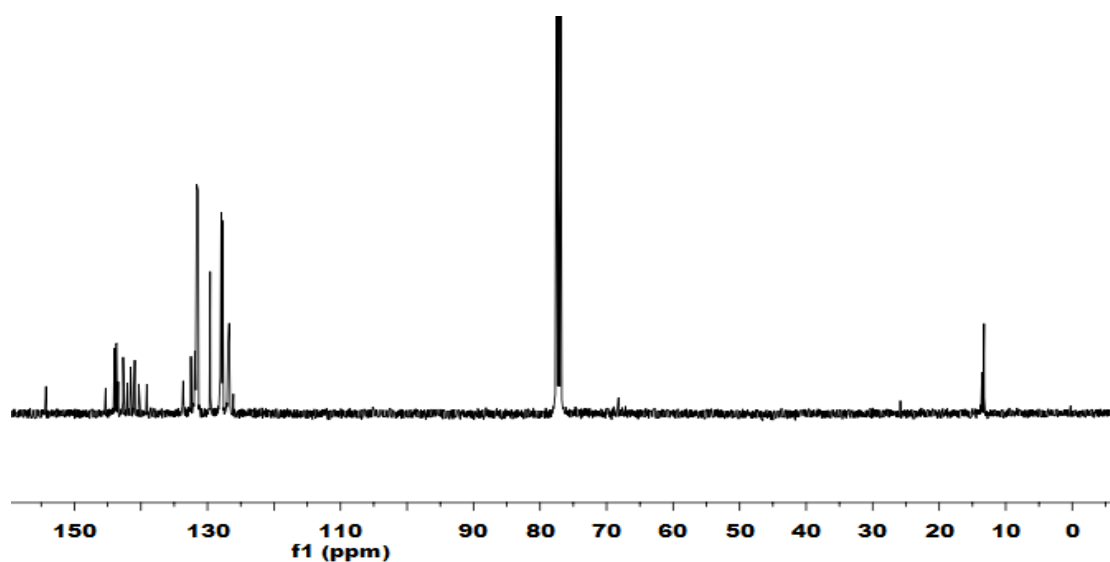

**Fig.S21** <sup>13</sup>C NMR spectra of the compound **6**

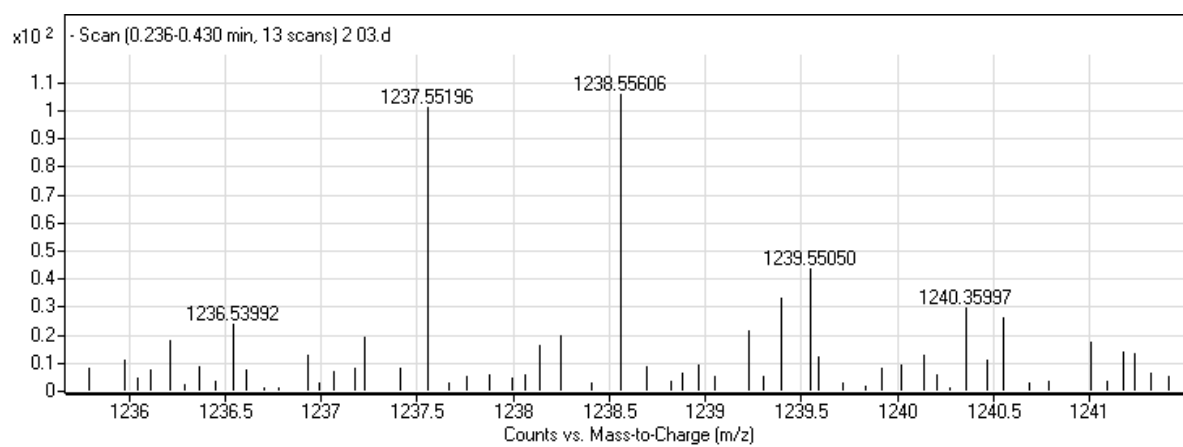

**Fig.S22** MALDI-TOF Analysis of the compound **6**

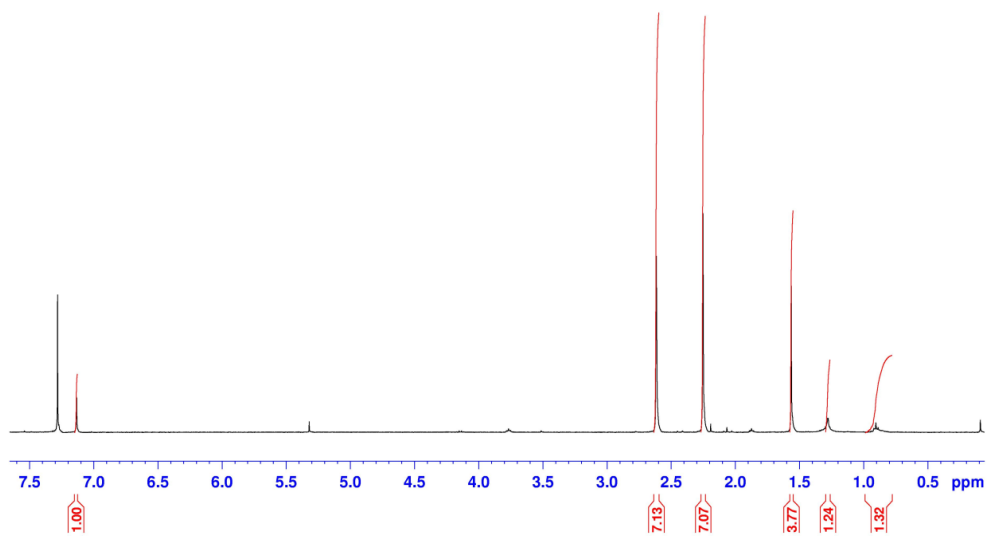

**Fig.S23** <sup>1</sup>H NMR spectra of the Iodinated-8H-BODIPY **8**

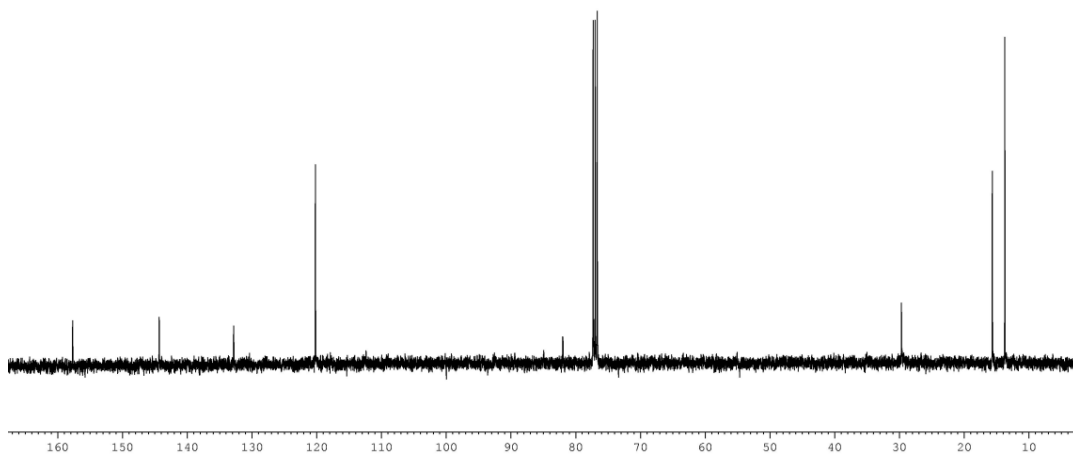

**Fig.S24** <sup>13</sup>C NMR spectra of the compound **8**

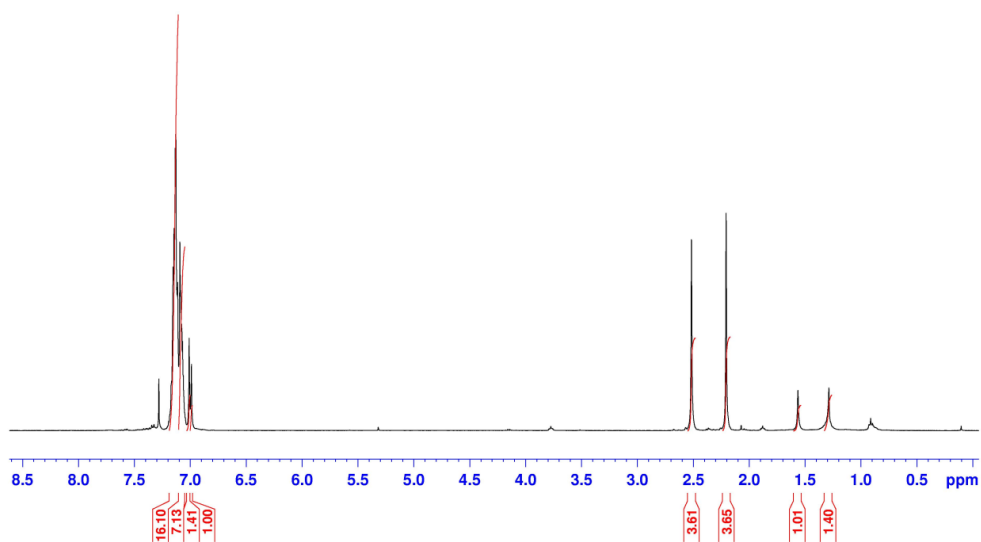

**Fig.S25** <sup>1</sup>H NMR spectra of (TPE)<sub>2</sub>BOD 9

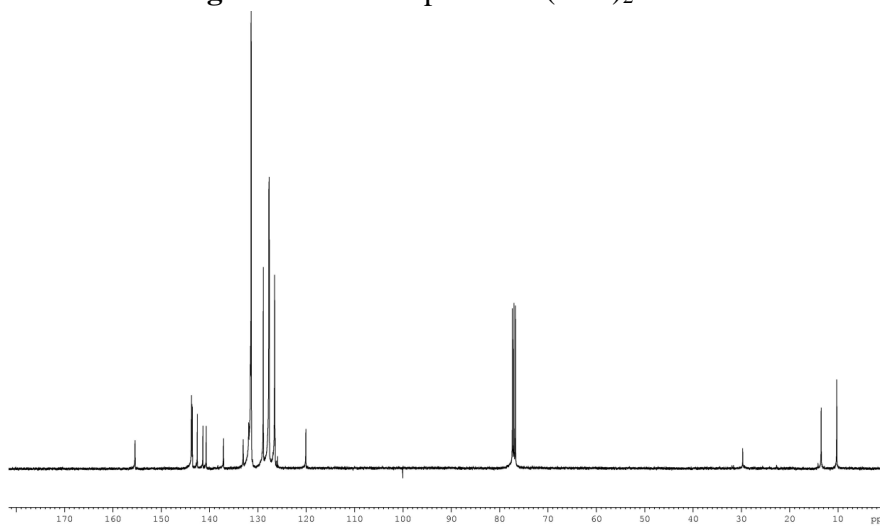

**Fig.S26** <sup>13</sup>C NMR spectra of the compound 9

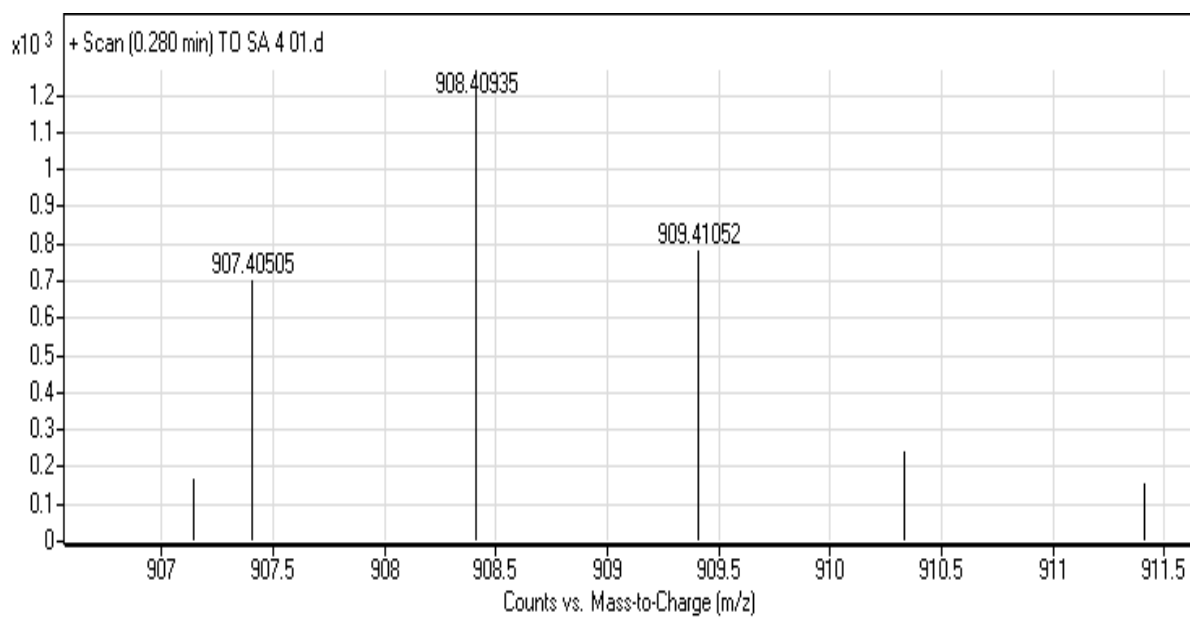

**Fig.S27** MALDI-TOF Analysis of the compound **9**

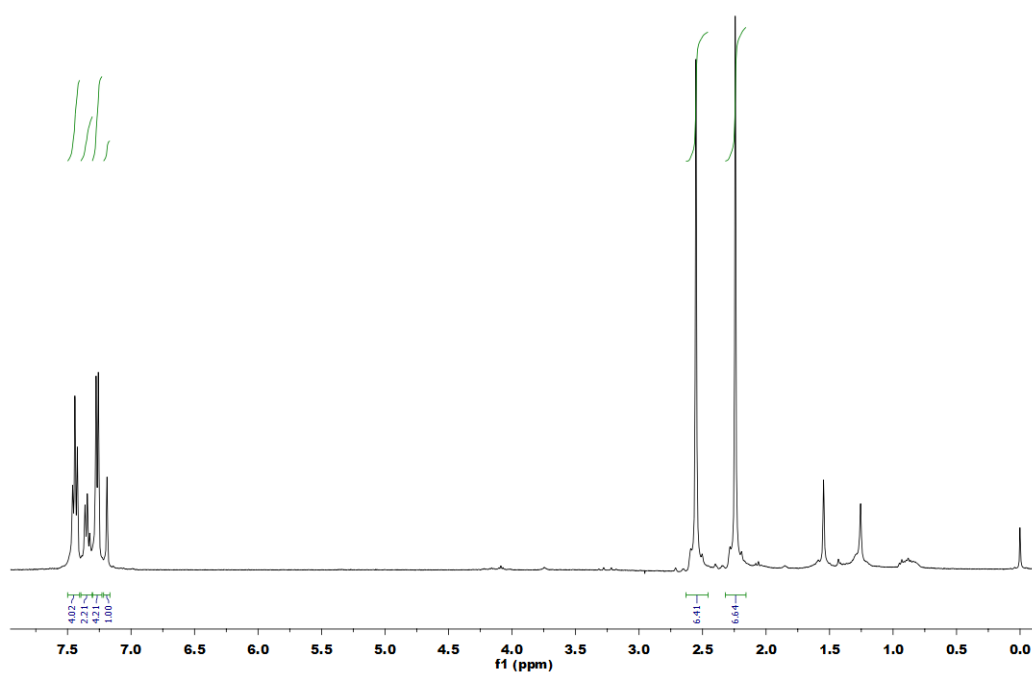

**Fig.S28**  $^1\text{H}$  NMR spectra of  $(\text{Ph})_2\text{BOD 11}$

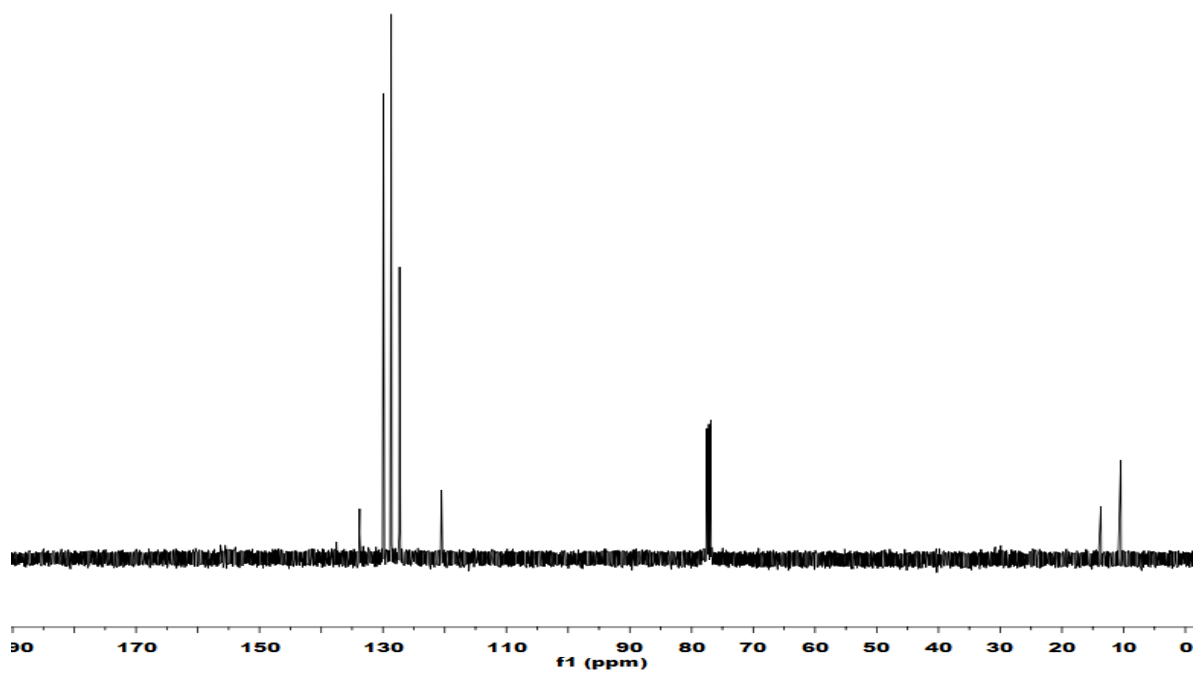

**Fig.29**  $^{13}\text{C}$  NMR spectra of the compound **11**

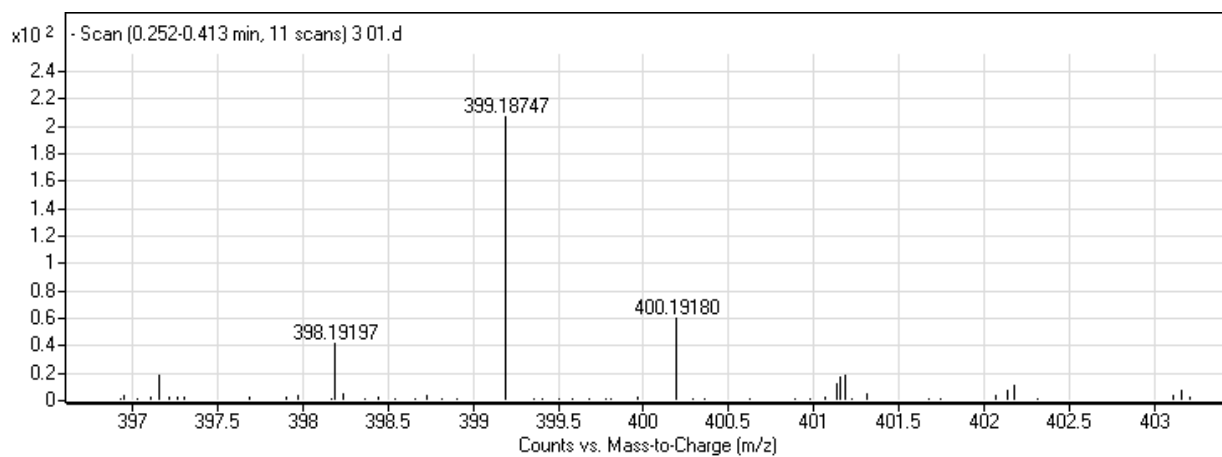

**Fig.S30** MALDI-TOF Analysis of the compound **11**

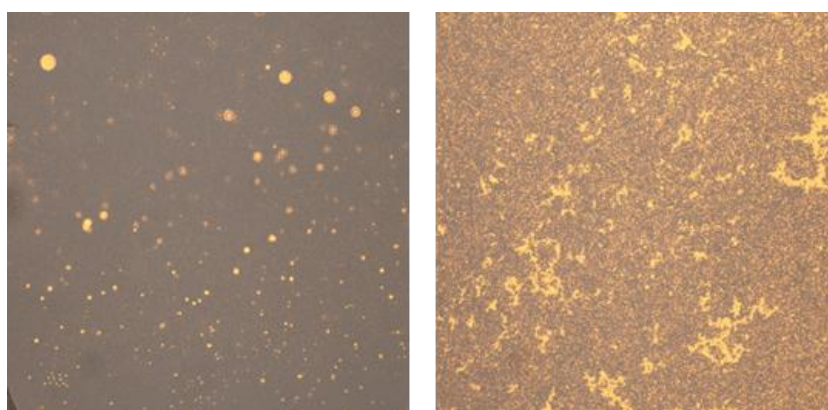

Fig. S31. Confocal Fluorescence microscope images of **9** (10 $\mu$ M) in a) %60 water-THF b) %80 water-THF. The excitation wavelength is 514 nm.

### S2.3 Cartesian Coordinates of the fluorophores

Optimized geometry of **9** at AM1 level:

| -----  |        |        |                         |           |           |  |
|--------|--------|--------|-------------------------|-----------|-----------|--|
| Center | Atomic | Atomic | Coordinates (Angstroms) |           |           |  |
| Number | Number | Type   | X                       | Y         | Z         |  |
| -----  |        |        |                         |           |           |  |
| 1      | 6      | 0      | 2.826919                | -0.141291 | 0.051481  |  |
| 2      | 6      | 0      | 3.491301                | 1.015099  | 0.481817  |  |
| 3      | 7      | 0      | 4.907420                | 1.114662  | 0.473414  |  |
| 4      | 5      | 0      | 5.893533                | -0.018490 | -0.004412 |  |
| 5      | 6      | 0      | 3.565799                | -1.242825 | -0.401801 |  |
| 6      | 7      | 0      | 4.984682                | -1.229125 | -0.443589 |  |
| 7      | 9      | 0      | 6.708581                | -0.371168 | 0.965818  |  |
| 8      | 9      | 0      | 6.636931                | 0.398114  | -1.006329 |  |
| 9      | 6      | 0      | 3.128363                | -2.540516 | -0.890763 |  |
| 10     | 6      | 0      | 5.416786                | -2.423904 | -0.921720 |  |
| 11     | 6      | 0      | 4.278469                | -3.266333 | -1.210748 |  |

|    |   |   |           |           |           |
|----|---|---|-----------|-----------|-----------|
| 12 | 6 | 0 | 2.969473  | 2.272826  | 0.991865  |
| 13 | 6 | 0 | 4.068577  | 3.087712  | 1.274173  |
| 14 | 6 | 0 | 5.259508  | 2.339425  | 0.941019  |
| 15 | 6 | 0 | 1.746745  | -3.001956 | -1.022805 |
| 16 | 6 | 0 | 6.828064  | -2.810662 | -1.118301 |
| 17 | 1 | 0 | 4.339885  | -4.276119 | -1.604269 |
| 18 | 6 | 0 | 1.560775  | 2.620307  | 1.175153  |
| 19 | 1 | 0 | 4.063325  | 4.098351  | 1.670173  |
| 20 | 6 | 0 | 6.641510  | 2.837561  | 1.088917  |
| 21 | 1 | 0 | 1.175428  | -2.331652 | -1.716018 |
| 22 | 1 | 0 | 1.713271  | -4.045065 | -1.423791 |
| 23 | 1 | 0 | 1.231040  | -2.982623 | -0.027762 |
| 24 | 1 | 0 | 7.379935  | -2.776291 | -0.143677 |
| 25 | 1 | 0 | 6.881480  | -3.845146 | -1.535355 |
| 26 | 1 | 0 | 7.332041  | -2.101088 | -1.824074 |
| 27 | 1 | 0 | 1.069767  | 1.901916  | 1.881613  |
| 28 | 1 | 0 | 1.457372  | 3.654891  | 1.586031  |
| 29 | 1 | 0 | 1.014097  | 2.564988  | 0.198145  |
| 30 | 1 | 0 | 7.159765  | 2.847071  | 0.095464  |
| 31 | 1 | 0 | 6.626970  | 3.873090  | 1.506536  |
| 32 | 1 | 0 | 7.224921  | 2.170557  | 1.774745  |
| 33 | 6 | 0 | 1.359832  | -0.200835 | 0.074692  |
| 34 | 6 | 0 | 0.619404  | 0.201528  | -1.044264 |
| 35 | 6 | 0 | 0.690750  | -0.666672 | 1.214820  |
| 36 | 6 | 0 | -0.771879 | 0.134263  | -1.024131 |
| 37 | 1 | 0 | 1.138344  | 0.571618  | -1.941761 |
| 38 | 6 | 0 | -0.699204 | -0.737961 | 1.228515  |



|    |   |   |           |           |           |
|----|---|---|-----------|-----------|-----------|
| 39 | 1 | 0 | 1.266712  | -0.980693 | 2.098780  |
| 40 | 6 | 0 | -1.445303 | -0.337982 | 0.109891  |
| 41 | 1 | 0 | -1.349857 | 0.463007  | -1.902596 |
| 42 | 1 | 0 | -1.222301 | -1.117284 | 2.120625  |
| 43 | 6 | 0 | -2.909209 | -0.455350 | 0.129871  |
| 44 | 6 | 0 | -3.741039 | 0.562475  | -0.190282 |
| 45 | 6 | 0 | -3.398394 | -1.780587 | 0.544989  |
| 46 | 6 | 0 | -3.876955 | -1.983640 | 1.845909  |
| 47 | 6 | 0 | -3.353760 | -2.859133 | -0.348805 |
| 48 | 6 | 0 | -4.308760 | -3.248124 | 2.243654  |
| 49 | 1 | 0 | -3.916044 | -1.140766 | 2.551672  |
| 50 | 6 | 0 | -3.786831 | -4.120967 | 0.054361  |
| 51 | 1 | 0 | -2.974284 | -2.706962 | -1.370032 |
| 52 | 6 | 0 | -4.264467 | -4.317738 | 1.350047  |
| 53 | 1 | 0 | -4.686176 | -3.399879 | 3.265644  |
| 54 | 1 | 0 | -3.750374 | -4.963060 | -0.652314 |
| 55 | 1 | 0 | -4.605453 | -5.314354 | 1.666015  |
| 56 | 6 | 0 | -3.256981 | 1.906396  | -0.547076 |
| 57 | 6 | 0 | -2.866000 | 2.806651  | 0.452533  |
| 58 | 6 | 0 | -3.226695 | 2.310645  | -1.888645 |
| 59 | 6 | 0 | -2.445171 | 4.091396  | 0.111981  |
| 60 | 1 | 0 | -2.891655 | 2.496738  | 1.507699  |
| 61 | 6 | 0 | -2.803641 | 3.595762  | -2.223164 |
| 62 | 1 | 0 | -3.543485 | 1.611823  | -2.677093 |
| 63 | 6 | 0 | -2.412431 | 4.487681  | -1.224589 |
| 64 | 1 | 0 | -2.139841 | 4.793463  | 0.901771  |
| 65 | 1 | 0 | -2.781669 | 3.906801  | -3.278041 |

|    |   |   |           |           |           |
|----|---|---|-----------|-----------|-----------|
| 66 | 1 | 0 | -2.080603 | 5.501769  | -1.490938 |
| 67 | 6 | 0 | -5.204037 | 0.430069  | -0.197596 |
| 68 | 6 | 0 | -5.990864 | 1.352212  | 0.508040  |
| 69 | 6 | 0 | -5.831619 | -0.589981 | -0.924667 |
| 70 | 6 | 0 | -7.379681 | 1.247592  | 0.492643  |
| 71 | 1 | 0 | -5.501708 | 2.161969  | 1.071236  |
| 72 | 6 | 0 | -7.222004 | -0.686027 | -0.943395 |
| 73 | 1 | 0 | -5.219105 | -1.322428 | -1.473158 |
| 74 | 6 | 0 | -7.998072 | 0.230038  | -0.234306 |
| 75 | 1 | 0 | -7.988813 | 1.971890  | 1.053029  |
| 76 | 1 | 0 | -7.705852 | -1.489424 | -1.517983 |
| 77 | 1 | 0 | -9.094794 | 0.151137  | -0.248301 |

-----  
Optimized geometry of 6 at AM1 level:  
-----

| Center | Atomic | Atomic | Coordinates (Angstroms) |           |           |
|--------|--------|--------|-------------------------|-----------|-----------|
| Number | Number | Type   | X                       | Y         | Z         |
| 1      | 6      | 0      | -0.100743               | -0.824474 | 0.052089  |
| 2      | 6      | 0      | 1.106765                | -1.535584 | 0.043255  |
| 3      | 7      | 0      | 1.143088                | -2.952885 | -0.029646 |
| 4      | 5      | 0      | -0.122117               | -3.889740 | -0.109194 |
| 5      | 6      | 0      | -1.318382               | -1.516059 | -0.009951 |
| 6      | 7      | 0      | -1.374204               | -2.932556 | -0.084671 |
| 7      | 9      | 0      | -0.150997               | -4.726499 | 0.905218  |
| 8      | 9      | 0      | -0.103802               | -4.610675 | -1.209173 |

|    |   |   |           |           |           |
|----|---|---|-----------|-----------|-----------|
| 9  | 6 | 0 | -2.687310 | -1.025685 | -0.012394 |
| 10 | 6 | 0 | -2.676132 | -3.314174 | -0.131259 |
| 11 | 6 | 0 | -3.522344 | -2.143270 | -0.087662 |
| 12 | 6 | 0 | 2.482161  | -1.067193 | 0.100064  |
| 13 | 6 | 0 | 3.301720  | -2.197912 | 0.060498  |
| 14 | 6 | 0 | 2.439514  | -3.355201 | -0.020276 |
| 15 | 6 | 0 | -3.112772 | 0.372167  | 0.052591  |
| 16 | 6 | 0 | -3.160613 | -4.706475 | -0.213159 |
| 17 | 6 | 0 | 2.925120  | 0.324095  | 0.182961  |
| 18 | 6 | 0 | 2.904842  | -4.755013 | -0.083027 |
| 19 | 1 | 0 | -2.700018 | 0.947092  | -0.816518 |
| 20 | 1 | 0 | -4.228053 | 0.448769  | 0.036265  |
| 21 | 1 | 0 | -2.733094 | 0.853444  | 0.991022  |
| 22 | 1 | 0 | -2.814710 | -5.291483 | 0.677768  |
| 23 | 1 | 0 | -4.276647 | -4.716385 | -0.249422 |
| 24 | 1 | 0 | -2.756492 | -5.206499 | -1.130910 |
| 25 | 1 | 0 | 2.512465  | 0.811391  | 1.104112  |
| 26 | 1 | 0 | 4.041040  | 0.384148  | 0.214477  |
| 27 | 1 | 0 | 2.558543  | 0.904592  | -0.703101 |
| 28 | 1 | 0 | 2.552678  | -5.239713 | -1.029956 |
| 29 | 1 | 0 | 4.020562  | -4.783990 | -0.047438 |
| 30 | 1 | 0 | 2.492185  | -5.341867 | 0.777751  |
| 31 | 6 | 0 | -0.092475 | 0.642109  | 0.126209  |
| 32 | 6 | 0 | -0.070916 | 1.407894  | -1.046523 |
| 33 | 6 | 0 | -0.112360 | 1.285566  | 1.371253  |
| 34 | 6 | 0 | -0.073853 | 2.799070  | -0.974276 |
| 35 | 1 | 0 | -0.051787 | 0.909022  | -2.027607 |

|    |   |   |           |          |           |
|----|---|---|-----------|----------|-----------|
| 36 | 6 | 0 | -0.121335 | 2.675745 | 1.438815  |
| 37 | 1 | 0 | -0.125444 | 0.689455 | 2.296567  |
| 38 | 6 | 0 | -0.101682 | 3.447252 | 0.267338  |
| 39 | 1 | 0 | -0.044989 | 3.396592 | -1.899460 |
| 40 | 1 | 0 | -0.150819 | 3.179214 | 2.418113  |
| 41 | 6 | 0 | -0.148907 | 4.912413 | 0.358275  |
| 42 | 6 | 0 | 0.728070  | 5.725187 | -0.274748 |
| 43 | 6 | 0 | -1.231155 | 5.424945 | 1.214971  |
| 44 | 6 | 0 | -0.956512 | 5.865187 | 2.516279  |
| 45 | 6 | 0 | -2.551957 | 5.441055 | 0.746630  |
| 46 | 6 | 0 | -1.989915 | 6.319247 | 3.334499  |
| 47 | 1 | 0 | 0.078341  | 5.856558 | 2.889200  |
| 48 | 6 | 0 | -3.580962 | 5.896122 | 1.569052  |
| 49 | 1 | 0 | -2.774478 | 5.091868 | -0.272495 |
| 50 | 6 | 0 | -3.302259 | 6.335437 | 2.863264  |
| 51 | 1 | 0 | -1.766820 | 6.666338 | 4.354152  |
| 52 | 1 | 0 | -4.615295 | 5.907389 | 1.195064  |
| 53 | 1 | 0 | -4.115868 | 6.693880 | 3.510495  |
| 54 | 6 | 0 | 1.848081  | 5.215288 | -1.083028 |
| 55 | 6 | 0 | 3.021248  | 4.765514 | -0.463411 |
| 56 | 6 | 0 | 1.765435  | 5.218520 | -2.482064 |
| 57 | 6 | 0 | 4.093729  | 4.319924 | -1.234694 |
| 58 | 1 | 0 | 3.093860  | 4.764577 | 0.634225  |
| 59 | 6 | 0 | 2.840253  | 4.770494 | -3.247860 |
| 60 | 1 | 0 | 0.850980  | 5.581354 | -2.974487 |
| 61 | 6 | 0 | 4.005234  | 4.320763 | -2.626348 |
| 62 | 1 | 0 | 5.012129  | 3.968401 | -0.741880 |

|    |   |   |           |           |           |
|----|---|---|-----------|-----------|-----------|
| 63 | 1 | 0 | 2.768937  | 4.775069  | -4.345534 |
| 64 | 1 | 0 | 4.852633  | 3.969307  | -3.232828 |
| 65 | 6 | 0 | 0.657324  | 7.190784  | -0.204268 |
| 66 | 6 | 0 | 1.795146  | 7.926915  | 0.157450  |
| 67 | 6 | 0 | -0.525582 | 7.871200  | -0.521697 |
| 68 | 6 | 0 | 1.744856  | 9.317882  | 0.209164  |
| 69 | 1 | 0 | 2.729727  | 7.396277  | 0.396512  |
| 70 | 6 | 0 | -0.568910 | 9.263602  | -0.476029 |
| 71 | 1 | 0 | -1.424746 | 7.298540  | -0.797485 |
| 72 | 6 | 0 | 0.563983  | 9.989041  | -0.109210 |
| 73 | 1 | 0 | 2.640330  | 9.886997  | 0.498849  |
| 74 | 1 | 0 | -1.501640 | 9.789138  | -0.728088 |
| 75 | 1 | 0 | 0.527126  | 11.087418 | -0.071376 |
| 76 | 6 | 0 | 4.840467  | -2.250152 | 0.094080  |
| 77 | 6 | 0 | 5.511875  | -2.249870 | 1.317062  |
| 78 | 6 | 0 | 5.562940  | -2.297861 | -1.098105 |
| 79 | 6 | 0 | 6.905466  | -2.296606 | 1.347743  |
| 80 | 1 | 0 | 4.942028  | -2.211474 | 2.256765  |
| 81 | 6 | 0 | 6.956926  | -2.345610 | -1.067568 |
| 82 | 1 | 0 | 5.033920  | -2.298271 | -2.062089 |
| 83 | 6 | 0 | 7.628257  | -2.344852 | 0.155073  |
| 84 | 1 | 0 | 7.434768  | -2.295753 | 2.311659  |
| 85 | 1 | 0 | 7.526286  | -2.383636 | -2.007705 |
| 86 | 6 | 0 | -5.061756 | -2.170787 | -0.120089 |
| 87 | 6 | 0 | -5.783006 | -2.261486 | 1.070728  |
| 88 | 6 | 0 | -5.735011 | -2.104927 | -1.339899 |
| 89 | 6 | 0 | -7.177181 | -2.286994 | 1.041601  |

|     |   |   |            |           |           |
|-----|---|---|------------|-----------|-----------|
| 90  | 1 | 0 | -5.251914  | -2.314167 | 2.032189  |
| 91  | 6 | 0 | -7.129627  | -2.129438 | -1.369144 |
| 92  | 1 | 0 | -5.166714  | -2.033259 | -2.278532 |
| 93  | 6 | 0 | -7.850761  | -2.220592 | -0.178684 |
| 94  | 1 | 0 | -7.745733  | -2.359115 | 1.980133  |
| 95  | 1 | 0 | -7.660196  | -2.077081 | -2.331032 |
| 96  | 6 | 0 | 9.167009   | -2.396533 | 0.189302  |
| 97  | 6 | 0 | 9.889975   | -1.253030 | 0.109997  |
| 98  | 6 | 0 | -9.390176  | -2.248697 | -0.210491 |
| 99  | 6 | 0 | -10.095055 | -1.092883 | -0.148798 |
| 100 | 6 | 0 | -9.537362  | 0.190563  | -0.791718 |
| 101 | 6 | 0 | -9.333922  | 0.248309  | -2.170757 |
| 102 | 6 | 0 | -9.235728  | 1.295317  | 0.004575  |
| 103 | 6 | 0 | -8.828323  | 1.410354  | -2.753202 |
| 104 | 1 | 0 | -9.571100  | -0.623095 | -2.798167 |
| 105 | 6 | 0 | -8.730895  | 2.458134  | -0.578014 |
| 106 | 1 | 0 | -9.396177  | 1.250038  | 1.091468  |
| 107 | 6 | 0 | -8.527031  | 2.515775  | -1.956656 |
| 108 | 1 | 0 | -8.667352  | 1.455728  | -3.840090 |
| 109 | 1 | 0 | -8.493547  | 3.329171  | 0.050027  |
| 110 | 1 | 0 | -8.128450  | 3.431918  | -2.416125 |
| 111 | 6 | 0 | -11.458427 | -1.062800 | 0.566683  |
| 112 | 6 | 0 | -12.635797 | -1.195950 | -0.169892 |
| 113 | 6 | 0 | -11.516251 | -0.902554 | 1.951069  |
| 114 | 6 | 0 | -13.870695 | -1.168173 | 0.477778  |
| 115 | 1 | 0 | -12.589901 | -1.321499 | -1.261392 |
| 116 | 6 | 0 | -12.751408 | -0.875735 | 2.599205  |

|     |   |   |            |           |           |
|-----|---|---|------------|-----------|-----------|
| 117 | 1 | 0 | -10.588391 | -0.797774 | 2.531780  |
| 118 | 6 | 0 | -13.928555 | -1.008372 | 1.862817  |
| 119 | 1 | 0 | -14.798779 | -1.272488 | -0.102805 |
| 120 | 1 | 0 | -12.796675 | -0.749787 | 3.690792  |
| 121 | 1 | 0 | -14.902342 | -0.986560 | 2.373268  |
| 122 | 6 | 0 | -10.131135 | -3.594848 | -0.312753 |
| 123 | 6 | 0 | -10.611829 | -4.034504 | -1.546490 |
| 124 | 6 | 0 | -10.321596 | -4.374617 | 0.827963  |
| 125 | 6 | 0 | -11.283413 | -5.253351 | -1.639279 |
| 126 | 1 | 0 | -10.462187 | -3.419155 | -2.445487 |
| 127 | 6 | 0 | -10.992499 | -5.594323 | 0.735144  |
| 128 | 1 | 0 | -9.942643  | -4.028335 | 1.800389  |
| 129 | 6 | 0 | -11.473521 | -6.033716 | -0.498181 |
| 130 | 1 | 0 | -11.662880 | -5.599663 | -2.611580 |
| 131 | 1 | 0 | -11.142161 | -6.209118 | 1.634645  |
| 132 | 1 | 0 | -12.003020 | -6.994725 | -0.571597 |
| 133 | 6 | 0 | 9.178406   | 0.106989  | -0.014968 |
| 134 | 6 | 0 | 8.896188   | 0.633305  | -1.275847 |
| 135 | 6 | 0 | 8.815955   | 0.812584  | 1.132339  |
| 136 | 6 | 0 | 8.252265   | 1.865260  | -1.389302 |
| 137 | 1 | 0 | 9.182756   | 0.077141  | -2.180171 |
| 138 | 6 | 0 | 8.170947   | 2.044467  | 1.019027  |
| 139 | 1 | 0 | 9.038151   | 0.397828  | 2.126188  |
| 140 | 6 | 0 | 7.889188   | 2.570940  | -0.241518 |
| 141 | 1 | 0 | 8.030346   | 2.280465  | -2.383109 |
| 142 | 1 | 0 | 7.884920   | 2.600380  | 1.923805  |
| 143 | 1 | 0 | 7.381435   | 3.542246  | -0.331222 |

|     |   |   |           |           |           |
|-----|---|---|-----------|-----------|-----------|
| 144 | 6 | 0 | 11.428378 | -1.313824 | 0.144964  |
| 145 | 6 | 0 | 12.148174 | -1.451316 | -1.042243 |
| 146 | 6 | 0 | 12.102172 | -1.231327 | 1.363464  |
| 147 | 6 | 0 | 13.541421 | -1.506967 | -1.010801 |
| 148 | 1 | 0 | 11.616639 | -1.517101 | -2.002652 |
| 149 | 6 | 0 | 13.495882 | -1.285988 | 1.394999  |
| 150 | 1 | 0 | 11.535024 | -1.122781 | 2.299247  |
| 151 | 6 | 0 | 14.215553 | -1.423923 | 0.208160  |
| 152 | 1 | 0 | 14.108814 | -1.615970 | -1.946472 |
| 153 | 1 | 0 | 14.026887 | -1.220505 | 2.355842  |
| 154 | 1 | 0 | 15.314085 | -1.467766 | 0.232697  |
| 155 | 6 | 0 | 9.886678  | -3.752301 | 0.314077  |
| 156 | 6 | 0 | 10.193850 | -4.265552 | 1.574510  |
| 157 | 6 | 0 | 10.231323 | -4.467209 | -0.832951 |
| 158 | 6 | 0 | 10.846124 | -5.493123 | 1.687776  |
| 159 | 1 | 0 | 9.922692  | -3.701325 | 2.478591  |
| 160 | 6 | 0 | 10.882918 | -5.695635 | -0.719798 |
| 161 | 1 | 0 | 9.989139  | -4.062918 | -1.826443 |
| 162 | 6 | 0 | 11.190472 | -6.208601 | 0.540287  |
| 163 | 1 | 0 | 11.088834 | -5.897441 | 2.681212  |
| 164 | 1 | 0 | 11.154165 | -6.259280 | -1.624344 |
| 165 | 1 | 0 | 11.704710 | -7.176504 | 0.629844  |

**S2.5 Calculated electronic excitation energies with the first 20 excited states of fluorophores and oscillator strengths in THF and water.**

**TPEBOD 3 in THF**



| B3LYP/6-311G* (THF) |                        |                     |                  |            |                  |                    |      |               |             |     |
|---------------------|------------------------|---------------------|------------------|------------|------------------|--------------------|------|---------------|-------------|-----|
| Excited State       | Excitation energy (nm) | oscillator strength | Gaussian Comment | My Comment | E (homo-lumo)    | HOMO               | LUMO | stoichiometry | Nelectron   |     |
| 1                   | 435,57                 | 0,5636              | 152 ->153        | 0.59701    | HOMO -> LUMO     | 0,10895            | 152  | 153           | C39H33BF2N2 | 304 |
| 2                   | 430,88                 | 0,0025              | 151 ->153        | 0.69590    |                  | 2.9646804011975 eV |      |               |             | 152 |
| 3                   | 363,20                 | 0,0332              | 150 ->153        | 0.66377    |                  |                    |      |               |             |     |
| 4                   | 335,77                 | 0,0535              | 148 ->153        | 0.65985    |                  |                    |      |               |             |     |
| 5                   | 331,53                 | 0,0002              | 152 ->154        | 0.69523    |                  |                    |      |               |             |     |
| 6                   | 326,11                 | 0,0056              | 149 ->153        | 0.55133    |                  |                    |      |               |             |     |
| 7                   | 318,89                 | 0,0018              | 147 ->153        | 0.53634    |                  |                    |      |               |             |     |
| 8                   | 309,57                 | 0,0017              | 146 ->153        | 0.57471    |                  |                    |      |               |             |     |
| 9                   | 306,80                 | 0,6434              | 151 ->154        | 0.66535    | HOMO-1 -> LUMO+1 |                    |      |               |             |     |
| 10                  | 306,07                 | 0,0113              | 145 ->153        | 0.47199    |                  |                    |      |               |             |     |
| 11                  | 303,42                 | 0,0022              | 145 ->153        | 0.51227    |                  |                    |      |               |             |     |
| 12                  | 297,52                 | 0,0033              | 143 ->153        | 0.48866    |                  |                    |      |               |             |     |
| 13                  | 291,27                 | 0,0053              | 152 ->155        | 0.65438    |                  |                    |      |               |             |     |
| 14                  | 289,49                 | 0,0010              | 142 ->153        | 0.54097    |                  |                    |      |               |             |     |
| 15                  | 276,78                 | 0,0994              | 151 ->155        | 0.66004    |                  |                    |      |               |             |     |
| 16                  | 272,36                 | 0,0001              | 152 ->156        | 0.67183    |                  |                    |      |               |             |     |
| 17                  | 267,98                 | 0,0314              | 151 ->156        | 0.54101    |                  |                    |      |               |             |     |
| 18                  | 264,16                 | 0,0028              | 152 ->157        | 0.63524    |                  |                    |      |               |             |     |
| 19                  | 262,52                 | 0,0023              | 151 ->157        | 0.45796    |                  |                    |      |               |             |     |
| 20                  | 261,86                 | 0,0032              | 141 ->153        | 0.65515    |                  |                    |      |               |             |     |

### TPEBOD 3 in water

| B3LYP/6-311G* (H2O) |                        |                     |                  |            |                  |                   |      |               |             |     |
|---------------------|------------------------|---------------------|------------------|------------|------------------|-------------------|------|---------------|-------------|-----|
| Excited State       | Excitation energy (nm) | oscillator strength | Gaussian Comment | My Comment | E (homo-lumo)    | HOMO              | LUMO | stoichiometry | Nelectron   |     |
| 1                   | 439,04                 | 0,0012              | 151 ->153        | 0.69604    |                  | 0,10918           | 152  | 153           | C39H33BF2N2 | 304 |
| 2                   | 433,02                 | 0,5465              | 152 ->153        | 0.59563    | HOMO -> LUMO     | 2.970939019759 eV |      |               |             | 152 |
| 3                   | 363,36                 | 0,0319              | 150 ->153        | 0.65013    |                  |                   |      |               |             |     |
| 4                   | 334,61                 | 0,0542              | 146 ->153        | 0.65893    |                  |                   |      |               |             |     |
| 5                   | 330,47                 | 0,0074              | 149 ->153        | 0.53964    |                  |                   |      |               |             |     |
| 6                   | 325,96                 | 0,0002              | 152 ->154        | 0.69481    |                  |                   |      |               |             |     |
| 7                   | 323,14                 | 0,0026              | 148 ->153        | 0.55722    |                  |                   |      |               |             |     |
| 8                   | 313,04                 | 0,0016              | 147 ->153        | 0.59767    |                  |                   |      |               |             |     |
| 9                   | 310,22                 | 0,0016              | 145 ->153        | 0.47985    |                  |                   |      |               |             |     |
| 10                  | 307,18                 | 0,0060              | 145 ->153        | 0.49151    |                  |                   |      |               |             |     |
| 11                  | 306,15                 | 0,6373              | 151 ->154        | 0.66540    | HOMO-1 -> LUMO+1 |                   |      |               |             |     |
| 12                  | 300,83                 | 0,0030              | 143 ->153        | 0.48324    |                  |                   |      |               |             |     |
| 13                  | 291,94                 | 0,0008              | 152 ->155        | 0.64576    |                  |                   |      |               |             |     |
| 14                  | 286,47                 | 0,0052              | 152 ->155        | 0.64576    |                  |                   |      |               |             |     |
| 15                  | 276,22                 | 0,0984              | 151 ->155        | 0.65909    |                  |                   |      |               |             |     |
| 16                  | 269,19                 | 0,0006              | 152 ->156        | 0.66122    |                  |                   |      |               |             |     |
| 17                  | 267,92                 | 0,0278              | 151 ->156        | 0.54729    |                  |                   |      |               |             |     |
| 18                  | 264,60                 | 0,0016              | 141 ->153        | 0.68008    |                  |                   |      |               |             |     |
| 19                  | 262,49                 | 0,0063              | 151 ->157        | 0.46776    |                  |                   |      |               |             |     |
| 20                  | 261,28                 | 0,0120              | 152 ->160        | 0.10340    |                  |                   |      |               |             |     |

### (TPE)<sub>2</sub>BOD 9 in THF

| B3LYP/6-31G* (THF) |                        |                     |                  |            |               |                    |      |               |             |     |
|--------------------|------------------------|---------------------|------------------|------------|---------------|--------------------|------|---------------|-------------|-----|
| Excited State      | Excitation energy (nm) | oscillator strength | Gaussian Comment | My Comment | E (homo-lumo) | HOMO               | LUMO | stoichiometry | Nelectron   |     |
| 1                  | 444,16                 | 0,9378              | 326 -> 327       | 0.59625    | HOMO -> LUMO  | 0,10789            | 326  | 327           | C91H69BF2N2 | 652 |
| 2                  | 427,59                 | 0,0008              | 325 -> 327       | 0.69684    |               | 2.9358363330445 eV |      |               |             | 326 |
| 3                  | 369,64                 | 0,0714              | 321 -> 327       | 0.55497    |               |                    |      |               |             |     |
| 4                  | 363,94                 | 0,0107              | 324 -> 327       | 0.61013    |               |                    |      |               |             |     |
| 5                  | 356,16                 | 0,0030              | 323 -> 327       | 0.64174    |               |                    |      |               |             |     |
| 6                  | 346,83                 | 0,0001              | 322 -> 327       | 0.67013    |               |                    |      |               |             |     |
| 7                  | 341,75                 | 0,0476              | 319 -> 327       | 0.61117    |               |                    |      |               |             |     |
| 8                  | 331,42                 | 0,0003              | 326 -> 328       | 0.69625    |               |                    |      |               |             |     |
| 9                  | 324,04                 | 0,0099              | 318 -> 327       | 0.55024    |               |                    |      |               |             |     |
| 10                 | 320,26                 | 0,0006              | 316 -> 327       | 0.49412    |               |                    |      |               |             |     |
| 11                 | 317,68                 | 0,0031              | 317 -> 327       | 0.50094    |               |                    |      |               |             |     |
| 12                 | 316,77                 | 0,0005              | 312 -> 327       | 0.41530    |               |                    |      |               |             |     |
| 13                 | 314,76                 | 0,0001              | 315 -> 327       | 0.45897    |               |                    |      |               |             |     |
| 14                 | 309,95                 | 0,0000              | 320 -> 327       | 0.54432    |               |                    |      |               |             |     |
| 15                 | 308,86                 | 0,0004              | 308 -> 327       | 0.40820    |               |                    |      |               |             |     |
| 16                 | 307,69                 | 0,0030              | 310 -> 327       | 0.54710    |               |                    |      |               |             |     |
| 17                 | 305,36                 | 0,0000              | 313 -> 327       | 0.56167    |               |                    |      |               |             |     |
| 18                 | 303,64                 | 0,0005              | 314 -> 327       | 0.44353    |               |                    |      |               |             |     |
| 19                 | 303,34                 | 0,0020              | 306 -> 327       | 0.36881    |               |                    |      |               |             |     |
| 20                 | 302,52                 | 0,0001              | 309 -> 327       | 0.56519    |               |                    |      |               |             |     |

### (TPE)<sub>2</sub>BOD 9 in water

| Excitation energy (nm) | oscillator strength | Gaussian Comment | My Comment | E (homo-lumo) | HOMO               | LUMO | stoichiometry | Nelectron   |     |
|------------------------|---------------------|------------------|------------|---------------|--------------------|------|---------------|-------------|-----|
| 442,19                 | 0,9174              | 326 -> 327       | 0.59333    | HOMO -> LUMO  | 0,10815            | 326  | 327           | C91H69BF2N2 | 652 |
| 439,46                 | 0,0086              | 325 -> 327       | 0.69442    |               | 2.9429112931575 eV |      |               |             | 326 |
| 372,59                 | 0,0245              | 324 -> 327       | 0.64073    |               |                    |      |               |             |     |
| 367,43                 | 0,0536              | 321 -> 327       | 0.56302    |               |                    |      |               |             |     |
| 359,80                 | 0,0041              | 323 -> 327       | 0.63554    |               |                    |      |               |             |     |
| 349,58                 | 0,0000              | 322 -> 327       | 0.67073    |               |                    |      |               |             |     |
| 340,66                 | 0,0481              | 318 -> 327       | 0.43405    |               |                    |      |               |             |     |
| 330,40                 | 0,0129              | 320 -> 327       | 0.55506    |               |                    |      |               |             |     |
| 323,94                 | 0,0010              | 326 -> 328       | 0.47822    |               |                    |      |               |             |     |
| 323,93                 | 0,0001              | 326 -> 328       | 0.50514    |               |                    |      |               |             |     |
| 323,18                 | 0,0032              | 314 -> 327       | 0.39792    |               |                    |      |               |             |     |
| 320,32                 | 0,0010              | 318 -> 327       | 0.40722    |               |                    |      |               |             |     |
| 317,60                 | 0,0001              | 312 -> 327       | 0.50143    |               |                    |      |               |             |     |
| 313,53                 | 0,0027              | 311 -> 327       | 0.56259    |               |                    |      |               |             |     |
| 313,03                 | 0,0000              | 319 -> 327       | 0.51155    |               |                    |      |               |             |     |
| 311,58                 | 0,0005              | 307 -> 327       | 0.36291    |               |                    |      |               |             |     |
| 309,51                 | 0,0023              | 308 -> 327       | 0.41856    |               |                    |      |               |             |     |
| 309,17                 | 0,0007              | 313 -> 327       | 0.50610    |               |                    |      |               |             |     |
| 307,54                 | 0,0005              | 309 -> 327       | 0.49893    |               |                    |      |               |             |     |
| 307,17                 | 0,0016              | 308 -> 327       | 0.41044    |               |                    |      |               |             |     |

### (TPE)<sub>3</sub>BOD 6 in THF

| B3LYP/6-31G* (THF) |                        |                     |                    |              |                  |      |      |               |           |  |
|--------------------|------------------------|---------------------|--------------------|--------------|------------------|------|------|---------------|-----------|--|
| Excited State      | Excitation energy (nm) | oscillator strength | Gaussian Comment   | My Comment   | E (homo-lumo)    | HOMO | LUMO | stoichiometry | Nelectron |  |
| 1                  | 521,78                 | 0,8964              | 239 -> 240 0.61919 | HOMO -> LUMO | 0,0978           | 239  | 240  | C65H51BF2N2   | 478       |  |
| 2                  | 464,08                 | 0,0112              | 238 -> 240 0.69069 |              | 2.66127345789 eV |      |      |               | 239       |  |
| 3                  | 419,20                 | 0,5652              | 237 -> 240 0.64780 |              |                  |      |      |               |           |  |
| 4                  | 372,03                 | 0,2571              | 236 -> 240 0.65980 |              |                  |      |      |               |           |  |
| 5                  | 364,67                 | 0,0255              | 235 -> 240 0.67122 |              |                  |      |      |               |           |  |
| 6                  | 335,54                 | 0,0025              | 234 -> 240 0.63477 |              |                  |      |      |               |           |  |
| 7                  | 335,33                 | 0,0013              | 233 -> 240 0.63544 |              |                  |      |      |               |           |  |
| 8                  | 330,59                 | 0,6468              | 239 -> 241 0.65931 |              |                  |      |      |               |           |  |
| 9                  | 328,18                 | 0,0073              | 239 -> 242 0.66404 |              |                  |      |      |               |           |  |
| 10                 | 317,93                 | 0,0001              | 232 -> 240 0.55100 |              |                  |      |      |               |           |  |
| 11                 | 317,87                 | 0,0001              | 231 -> 240 0.55159 |              |                  |      |      |               |           |  |
| 12                 | 314,44                 | 0,0029              | 228 -> 240 0.59162 |              |                  |      |      |               |           |  |
| 13                 | 314,12                 | 0,0008              | 227 -> 240 0.59502 |              |                  |      |      |               |           |  |
| 14                 | 311,49                 | 0,001               | 230 -> 240 0.63799 |              |                  |      |      |               |           |  |
| 15                 | 311,45                 | 0,0007              | 229 -> 240 0.63806 |              |                  |      |      |               |           |  |
| 16                 | 309,00                 | 0,0093              | 226 -> 240 0.60725 |              |                  |      |      |               |           |  |
| 17                 | 308,60                 | 0,0016              | 225 -> 240 0.62165 |              |                  |      |      |               |           |  |
| 18                 | 302,60                 | 0,0064              | 238 -> 241 0.55676 |              |                  |      |      |               |           |  |
| 19                 | 302,23                 | 0,5335              | 238 -> 242 0.53437 |              |                  |      |      |               |           |  |
| 20                 | 297,87                 | 0,0007              | 224 -> 240 0.49008 |              |                  |      |      |               |           |  |

### (TPE)<sub>3</sub>BOD 6 in water

| B3LYP/6-31G* (H2O) |                        |                     |                    |              |                  |      |      |               |           |  |
|--------------------|------------------------|---------------------|--------------------|--------------|------------------|------|------|---------------|-----------|--|
| Excited State      | Excitation energy (nm) | oscillator strength | Gaussian Comment   | My Comment   | E (homo-lumo)    | HOMO | LUMO | stoichiometry | Nelectron |  |
| 1                  | 518,77                 | 0,8585              | 239 -> 240 0.61932 | HOMO -> LUMO | 0,0982           | 239  | 240  | C65H51BF2N2   | 478       |  |
| 2                  | 464,11                 | 0,0106              | 238 -> 240 0.69129 |              | 2.67215801191 eV |      |      |               | 239       |  |
| 3                  | 418,42                 | 0,5820              | 237 -> 240 0.64636 |              |                  |      |      |               |           |  |
| 4                  | 371,02                 | 0,2736              | 236 -> 240 0.65864 |              |                  |      |      |               |           |  |
| 5                  | 363,99                 | 0,0255              | 235 -> 240 0.67129 |              |                  |      |      |               |           |  |
| 6                  | 335,43                 | 0,0034              | 233 -> 240 0.46480 |              |                  |      |      |               |           |  |
| 7                  | 335,37                 | 0,0000              | 234 -> 240 0.46507 |              |                  |      |      |               |           |  |
| 8                  | 329,47                 | 0,6568              | 239 -> 241 0.65794 |              |                  |      |      |               |           |  |
| 9                  | 326,82                 | 0,0070              | 239 -> 242 0.66187 |              |                  |      |      |               |           |  |
| 10                 | 318,42                 | 0,0001              | 232 -> 240 0.62349 |              |                  |      |      |               |           |  |
| 11                 | 318,29                 | 0,0002              | 231 -> 240 0.62188 |              |                  |      |      |               |           |  |
| 12                 | 314,84                 | 0,0038              | 228 -> 240 0.59249 |              |                  |      |      |               |           |  |
| 13                 | 314,48                 | 0,0008              | 227 -> 240 0.59465 |              |                  |      |      |               |           |  |
| 14                 | 312,51                 | 0,0003              | 230 -> 240 0.62969 |              |                  |      |      |               |           |  |
| 15                 | 312,49                 | 0,0005              | 229 -> 240 0.63190 |              |                  |      |      |               |           |  |
| 16                 | 309,78                 | 0,0109              | 226 -> 240 0.58226 |              |                  |      |      |               |           |  |
| 17                 | 309,33                 | 0,0019              | 225 -> 240 0.60190 |              |                  |      |      |               |           |  |
| 18                 | 302,37                 | 0,0008              | 238 -> 241 0.55697 |              |                  |      |      |               |           |  |
| 19                 | 301,98                 | 0,5071              | 238 -> 242 0.53297 |              |                  |      |      |               |           |  |
| 20                 | 298,18                 | 0,0005              | 224 -> 240 0.54345 |              |                  |      |      |               |           |  |
